# Supplementary material for: Organometallic calcium and strontium borohydrides as initiators for the polymerization of ε-caprolactone and l-lactide: combined experimental and computational investigations
Source: Royal Society of Chemistry journal article supplement (doi:10.1039/c3dt00037k), 2013-01-01
Supplement: c3dt00037k.pdf [file c3dt00037k.pdf]

Supplementary Information for  
**Organometallic Calcium and Strontium Borohydrides as Initiators for  
the Polymerization of  $\epsilon$ -Caprolactone and *L*-Lactide: Combined  
Experimental and Computational Investigations**

Magdalena Kuzdrowska,<sup>a</sup> Liana Annunziata,<sup>b</sup> Sebastian Marks,<sup>a</sup> Matthias Schmid,<sup>a,b</sup> Cedric G.  
Jaffredo,<sup>b</sup> Peter W. Roesky,<sup>a\*</sup> Sophie M. Guillaume,<sup>b\*</sup> and Laurent Maron<sup>c\*</sup>

<sup>a</sup> Institut für Anorganische Chemie and Helmholtz Research School: Energy-Related Catalysis, Karlsruher Institut für Technologie (KIT), Engesserstr. 15, 76131 Karlsruhe (Germany), Fax: (+49)721-608-44845, E-mail: [roesky@kit.edu](mailto:roesky@kit.edu)

<sup>b</sup> Sciences Chimiques de Rennes (UMR 6226), CNRS - Université de Rennes 1, Campus de Beaulieu, 35042 Rennes Cedex (France), Fax: (+33) 2-2323-6939, E-mail: [sophie.guillaume@univ-rennes1.fr](mailto:sophie.guillaume@univ-rennes1.fr)

<sup>c</sup> Université de Toulouse, INSA, UPS, CNRS-UMR5215, LPCNO, 135 Avenue de Ranguéil, 31077 Toulouse (France), E-mail: [laurent.maron@irsamc.ups-tlse.fr](mailto:laurent.maron@irsamc.ups-tlse.fr)

## Computational details

Calculations were carried out at the DFT level using the hybrid functional B3PW91<sup>[1]</sup> with the Gaussian 03<sup>[2]</sup> suite of programs. Strontium, phosphorus and silicon have been represented by a relativistic effective-core potential (RECP)<sup>[3]</sup> from the Stuttgart group and their corresponding optimized basis set. Polarized all-electron double- $\zeta$  6-31G(d,p)<sup>[4]</sup> basis sets were used for Ca, B, C, H, O and N. Geometry optimizations were carried out without any symmetry restriction. The nature of the extrema (minimum or transition state) was verified with analytical frequency calculations. The connectivity of the transition states were controlled by IRC calculations. For simplicity and in order to be in line with previous studies, the ligand of complex **2a** was simplified by replacing the phenyl backbone by a methyl group and the SiMe<sub>3</sub> substituents by simple SiH<sub>3</sub>. Moreover, for this complex, the monomer was used as reference rather than the dimer. In all cases, the replacement of THF by  $\epsilon$ -CL was done. It is noteworthy that for complex **2a** and **3a**, the replacement of one THF molecule was leading to the dissociation of the second one. Thus, we considered as reference the non-solvated complex unlike complex **1a** where one THF molecule remained coordinated after replacement.

## References

- [1] a) J. P. Perdew, Y. Wang, *Phys. Rev. B* **1992**, *45*, 13244; b) A. D. Becke, *J. Chem. Phys.* **1993**, *98*, 5648.
- [2] M. J. Frisch, G. W. Trucks, H. B. Schlegel, G. E. Scuseria, M. A. Robb, J. R. Cheeseman, V. G. Zakrzewski, J. A. Montgomery, R. E. Stratman, J. C. Burant, S. Dapprich, J. M. Millam, A. D. Daniels, K. N. Kudin, M. C. Strain, O. Farkas, J. Tomasi, V. Barone, M. Cossi, R. Cammi, B. Mennucci, C. Pomelli, C. Adamo, S. Clifford, J. Ochterski, G. A. Petersson, P. Y. Ayala, Q. Cui, K. Morokuma, D. K. Malick, A. D. Rabuck, K. Raghavachari, J. B. Foresman, J. Cioslowski, J. V. Ortiz, A. G. Baboul, B. B. Stefanov, G. Liu, A. Liashenko, P. Piskorz, I. Komaromi, R. Gomperts, R. Martin, D. J. Fox, T. Keith, M. A. AlLaham, C. Y. Peng, A. Nanayakkara, C. Gonzalez, M. Challacombe, P. M. W. Gill, B. Johnson, W. Chen, M. W. J. Wong, L. Andres, M. Head-Gordon, E. S. Replogle, J. A. Pople, *Gaussian 03; E.01 ed. Pittsburgh PA* **2006**.

- [3] a) P. Fuentealba, L. v. Szentpaly, H. Preuss, H. Stoll, *J. Phys. B: At., Mol. Opt. Phys.* **1985**, *18*, 1287; b) A. Bergner, M. Dolg, W. Küchle, H. Stoll, H. Preuss, *Mol. Phys.* **1993**, *80*, 1431.
- [4] J.-P. Blaudeau, M. P. McGrath, L. A. Curtiss, L. Radom, *J. Chem. Phys.* **1997**, *107*, 5016.

**1b**

37

scf done: -550.088318

|    |           |           |           |
|----|-----------|-----------|-----------|
| C  | -0.562508 | 0.989559  | 0.341821  |
| C  | -0.053372 | -0.453293 | 0.439704  |
| O  | 1.371975  | -0.360574 | 0.706513  |
| C  | 1.729123  | 1.021383  | 0.925774  |
| C  | 0.716584  | 1.800402  | 0.104715  |
| Sr | 3.034789  | -2.167254 | 0.123379  |
| O  | 3.538723  | -3.631723 | 2.114995  |
| C  | 2.957407  | -4.946640 | 2.324382  |
| C  | 3.933718  | -5.704289 | 3.231351  |
| C  | 5.237066  | -4.910243 | 3.089304  |
| C  | 4.717393  | -3.491251 | 2.938102  |
| B  | 5.261906  | -0.695346 | 0.119244  |
| B  | 1.411759  | -3.802947 | -1.213322 |
| H  | 1.643213  | 1.251250  | 1.996670  |
| H  | 2.769274  | 1.146049  | 0.616511  |
| H  | 0.629214  | 2.842530  | 0.422611  |
| H  | -0.174667 | -1.014646 | -0.490851 |
| H  | -0.526659 | -1.016598 | 1.250198  |
| H  | -1.034267 | 1.295612  | 1.281402  |
| H  | -1.299605 | 1.108818  | -0.456000 |
| H  | 4.470871  | -0.328916 | -0.768281 |
| H  | 0.990008  | -3.607814 | -0.059724 |
| H  | 5.508917  | -1.899712 | -0.070674 |
| H  | 2.559034  | -4.275521 | -1.120099 |
| H  | 4.674012  | -0.598865 | 1.210920  |
| H  | 6.268797  | -0.037368 | 0.101953  |
| H  | 0.687109  | -4.539691 | -1.829129 |
| H  | 1.506333  | -2.694914 | -1.771493 |
| H  | 1.000073  | 1.785880  | -0.953106 |
| H  | 1.966553  | -4.825359 | 2.773144  |
| H  | 2.838307  | -5.411069 | 1.341500  |
| H  | 3.589259  | -5.682451 | 4.270572  |
| H  | 4.035745  | -6.751386 | 2.935978  |
| H  | 5.904559  | -5.024464 | 3.947272  |
| H  | 5.782380  | -5.208444 | 2.187491  |
| H  | 4.431180  | -3.060403 | 3.907378  |
| H  | 5.396311  | -2.804083 | 2.428163  |

**$\epsilon$ -CL adduct to 1b**

42

scf done: -702.698952

|   |           |           |          |
|---|-----------|-----------|----------|
| O | -0.002763 | 0.051571  | 2.168762 |
| C | 0.234698  | -0.290553 | 3.557908 |
| C | -0.567758 | 0.720662  | 4.393208 |
| C | -1.467874 | 1.414864  | 3.361438 |
| C | -0.611808 | 1.354519  | 2.107794 |

|    |           |           |           |
|----|-----------|-----------|-----------|
| Sr | -0.017656 | -1.635617 | 0.283680  |
| O  | 1.433084  | -2.538787 | -1.943422 |
| C  | 1.322554  | -3.253075 | -3.198305 |
| C  | 0.742425  | -2.371930 | -4.296410 |
| C  | 1.331930  | -0.957052 | -4.312538 |
| C  | 2.856960  | -0.884923 | -4.177164 |
| C  | 3.426687  | -1.407390 | -2.825760 |
| C  | 2.384779  | -1.606344 | -1.759820 |
| O  | 2.336380  | -0.983133 | -0.709884 |
| B  | -1.674426 | -0.380359 | -1.417797 |
| B  | 0.053881  | -3.854897 | 1.756735  |
| H  | 4.156040  | -0.711313 | -2.409350 |
| H  | 3.943169  | -2.364292 | -2.965948 |
| H  | 0.677632  | -4.101547 | -2.966676 |
| H  | 3.158811  | 0.160776  | -4.287427 |
| H  | 3.334333  | -1.432382 | -4.997632 |
| H  | 2.311240  | -3.642791 | -3.460247 |
| H  | 1.036161  | -0.464215 | -5.244455 |
| H  | 0.864079  | -0.370629 | -3.511634 |
| H  | 0.930480  | -2.881680 | -5.250030 |
| H  | -0.342448 | -2.299968 | -4.174364 |
| H  | 1.310474  | -0.234203 | 3.756246  |
| H  | -0.092325 | -1.324573 | 3.692368  |
| H  | -1.137463 | 0.232808  | 5.187782  |
| H  | 0.102641  | 1.447185  | 4.863400  |
| H  | -2.393023 | 0.850649  | 3.205235  |
| H  | -1.732398 | 2.437155  | 3.644131  |
| H  | 0.172339  | 2.124887  | 2.114435  |
| H  | -1.168166 | 1.413739  | 1.169422  |
| H  | -0.900966 | -3.125992 | 2.080789  |
| H  | -1.481307 | -1.558834 | -1.759547 |
| H  | -0.571743 | 0.191716  | -1.371014 |
| H  | -2.141685 | -0.397888 | -0.267128 |
| H  | -2.422688 | 0.175116  | -2.181232 |
| H  | 1.098513  | -3.195125 | 1.895724  |
| H  | -0.070017 | -4.116565 | 0.547666  |
| H  | 0.077191  | -4.859323 | 2.419442  |

### Nucleophilic Attack TS to 1b

42

scf done: -702.645251

|    |           |           |           |
|----|-----------|-----------|-----------|
| O  | -1.071757 | -0.346940 | 1.727235  |
| C  | -0.025536 | -0.690962 | 2.664370  |
| C  | 0.000182  | 0.478660  | 3.632861  |
| C  | -1.493240 | 0.795702  | 3.779528  |
| C  | -2.062047 | 0.481740  | 2.390313  |
| Sr | -0.551738 | -0.344548 | -0.733830 |
| O  | 0.451875  | -2.439724 | -1.658731 |

|   |           |           |           |
|---|-----------|-----------|-----------|
| C | 0.402652  | -3.475567 | -2.629690 |
| C | 0.827858  | -3.023902 | -4.052395 |
| C | 1.196087  | -1.539973 | -4.133411 |
| C | 2.501650  | -1.166784 | -3.398840 |
| C | 2.848015  | -2.061578 | -2.207982 |
| C | 1.814413  | -2.087550 | -1.078035 |
| O | 1.654265  | -0.946918 | -0.414708 |
| B | -2.190309 | 1.539982  | -1.682761 |
| B | 3.413359  | -2.941167 | 1.550557  |
| H | 3.782388  | -1.720335 | -1.748335 |
| H | 3.039275  | -3.085735 | -2.554039 |
| H | -0.635883 | -3.823840 | -2.638402 |
| H | 2.455936  | -0.121926 | -3.071083 |
| H | 3.337531  | -1.223068 | -4.106933 |
| H | 1.015787  | -4.319058 | -2.283379 |
| H | 1.283411  | -1.257720 | -5.189006 |
| H | 0.356870  | -0.946803 | -3.749549 |
| H | 1.674001  | -3.629621 | -4.398888 |
| H | 0.007102  | -3.223415 | -4.750846 |
| H | 0.890211  | -0.840182 | 2.085948  |
| H | -0.290727 | -1.628765 | 3.171201  |
| H | 0.479511  | 0.227795  | 4.582554  |
| H | 0.539213  | 1.323111  | 3.189819  |
| H | -1.944861 | 0.144353  | 4.534918  |
| H | -1.683798 | 1.830383  | 4.074792  |
| H | -2.205003 | 1.374671  | 1.774633  |
| H | -3.008135 | -0.067198 | 2.433636  |
| H | 3.798909  | -1.858147 | 1.869596  |
| H | -1.533902 | 0.990994  | -2.588101 |
| H | -1.378596 | 2.002132  | -0.857872 |
| H | -2.853150 | 0.657692  | -1.108304 |
| H | -2.896301 | 2.406299  | -2.127649 |
| H | 2.036808  | -2.964388 | -0.419322 |
| H | 2.399016  | -3.378871 | 2.010943  |
| H | 4.078797  | -3.626117 | 0.831436  |

### Borane complex of 1b

42

scf done: -702.717191

|    |           |           |           |
|----|-----------|-----------|-----------|
| O  | -0.613303 | -0.251881 | 1.977170  |
| C  | -0.149291 | -0.930176 | 3.168495  |
| C  | -0.870031 | -0.245994 | 4.319939  |
| C  | -2.223236 | 0.085450  | 3.686060  |
| C  | -1.827816 | 0.491415  | 2.270759  |
| Sr | 0.613817  | -0.047819 | -0.235573 |
| O  | 0.964777  | -2.265064 | -1.427340 |
| C  | 0.306984  | -3.314997 | -2.135909 |
| C  | 0.267458  | -3.103980 | -3.670805 |

|   |           |           |           |
|---|-----------|-----------|-----------|
| C | 0.848181  | -1.756832 | -4.110065 |
| C | 2.380792  | -1.655590 | -3.958383 |
| C | 2.971816  | -2.520877 | -2.842953 |
| C | 2.428581  | -2.254412 | -1.447959 |
| O | 2.772165  | -1.003602 | -0.987105 |
| B | -1.153291 | 1.554357  | -1.411167 |
| B | 3.112172  | -0.873654 | 0.500930  |
| H | 4.054999  | -2.369352 | -2.781060 |
| H | 2.828088  | -3.583340 | -3.076617 |
| H | -0.707725 | -3.330336 | -1.727621 |
| H | 2.667064  | -0.610145 | -3.801733 |
| H | 2.858825  | -1.965130 | -4.895677 |
| H | 0.774062  | -4.273387 | -1.872633 |
| H | 0.578325  | -1.583825 | -5.157842 |
| H | 0.357544  | -0.957189 | -3.544882 |
| H | 0.800821  | -3.919205 | -4.174656 |
| H | -0.773590 | -3.170645 | -4.005594 |
| H | 0.939691  | -0.848815 | 3.202456  |
| H | -0.420524 | -1.991495 | 3.098177  |
| H | -0.948325 | -0.887712 | 5.201233  |
| H | -0.344236 | 0.670555  | 4.609095  |
| H | -2.864051 | -0.803055 | 3.668490  |
| H | -2.762952 | 0.881353  | 4.205334  |
| H | -1.598761 | 1.559877  | 2.197569  |
| H | -2.573288 | 0.246028  | 1.510663  |
| H | 2.971675  | 0.334512  | 0.750297  |
| H | -0.198150 | 1.308014  | -2.166334 |
| H | -0.692786 | 2.071476  | -0.376720 |
| H | -1.668655 | 0.466750  | -1.089676 |
| H | -1.953485 | 2.278842  | -1.941466 |
| H | 2.762201  | -3.038332 | -0.748806 |
| H | 2.252199  | -1.502417 | 1.150079  |
| H | 4.224784  | -1.252582 | 0.777116  |

### Ring Opening TS to 1b

42

scf done: -702.689098

|    |           |           |           |
|----|-----------|-----------|-----------|
| C  | -0.215587 | -0.741662 | 0.217224  |
| C  | 0.137497  | -0.065099 | 1.550347  |
| O  | 1.573726  | 0.137108  | 1.533348  |
| C  | 2.140138  | -0.571252 | 0.409828  |
| C  | 1.041058  | -0.531748 | -0.637912 |
| Sr | 2.771093  | 2.194788  | 2.370387  |
| O  | 4.502157  | 1.917628  | 1.004090  |
| C  | 5.838081  | 1.984839  | 0.659983  |
| C  | 6.519212  | 3.294164  | 1.109905  |
| C  | 6.230794  | 3.740456  | 2.547033  |
| C  | 6.954983  | 3.074792  | 3.727364  |

|   |           |           |           |
|---|-----------|-----------|-----------|
| C | 6.839824  | 1.559507  | 3.964377  |
| C | 5.469965  | 0.915965  | 3.800816  |
| O | 4.381656  | 1.638208  | 4.438235  |
| B | 4.201918  | 1.838241  | 5.790381  |
| B | 0.751298  | 3.772802  | 3.136730  |
| H | 7.231209  | 1.348587  | 4.968943  |
| H | 7.491868  | 1.014795  | 3.269011  |
| H | 5.987759  | 1.897467  | -0.432549 |
| H | 6.607397  | 3.583375  | 4.635365  |
| H | 8.026705  | 3.303736  | 3.658023  |
| H | 6.408126  | 1.132303  | 1.091167  |
| H | 6.463656  | 4.810216  | 2.621972  |
| H | 5.147135  | 3.686169  | 2.712021  |
| H | 7.603706  | 3.217250  | 0.943415  |
| H | 6.161641  | 4.095613  | 0.449699  |
| H | 2.371819  | -1.602470 | 0.712010  |
| H | 3.064953  | -0.052276 | 0.141180  |
| H | 1.024205  | 0.448760  | -1.125846 |
| H | 1.164864  | -1.295740 | -1.409883 |
| H | -1.113359 | -0.312138 | -0.233891 |
| H | -0.397009 | -1.810948 | 0.366731  |
| H | -0.121368 | -0.683019 | 2.416561  |
| H | -0.325884 | 0.918288  | 1.671054  |
| H | 3.546805  | 1.044784  | 6.412467  |
| H | 1.858547  | 4.315160  | 3.311075  |
| H | 0.731248  | 2.722162  | 3.801471  |
| H | 0.673210  | 3.459414  | 1.931974  |
| H | -0.144834 | 4.513379  | 3.447563  |
| H | 5.197280  | 0.886237  | 2.742641  |
| H | 5.477379  | -0.106974 | 4.197300  |
| H | 4.669076  | 2.812761  | 6.313166  |

### Product from 1b

42

scf done: -702.713607

|    |           |           |           |
|----|-----------|-----------|-----------|
| C  | -0.142817 | -0.744350 | 0.365392  |
| C  | 0.190654  | -0.049465 | 1.693796  |
| O  | 1.625151  | 0.170361  | 1.687550  |
| C  | 2.209261  | -0.538273 | 0.572536  |
| C  | 1.116706  | -0.523954 | -0.482589 |
| Sr | 2.745706  | 2.315939  | 2.411092  |
| O  | 4.463019  | 2.006051  | 1.035219  |
| C  | 5.786208  | 2.091596  | 0.651320  |
| C  | 6.476015  | 3.386832  | 1.128495  |
| C  | 6.209405  | 3.784305  | 2.583730  |
| C  | 6.946015  | 3.073252  | 3.728748  |
| C  | 6.867651  | 1.545408  | 3.892594  |
| C  | 5.514190  | 0.865095  | 3.738467  |



|   |           |           |           |
|---|-----------|-----------|-----------|
| O | 4.419748  | 1.570096  | 4.400802  |
| B | 4.235561  | 1.486797  | 5.742510  |
| B | 0.601540  | 3.865957  | 2.811996  |
| H | 7.285105  | 1.299984  | 4.877687  |
| H | 7.518888  | 1.053632  | 3.158842  |
| H | 5.901686  | 2.045943  | -0.447852 |
| H | 6.595373  | 3.532821  | 4.662256  |
| H | 8.013115  | 3.324891  | 3.669658  |
| H | 6.373542  | 1.227150  | 1.031962  |
| H | 6.444265  | 4.850491  | 2.694423  |
| H | 5.127264  | 3.724058  | 2.758597  |
| H | 7.557680  | 3.316519  | 0.942726  |
| H | 6.107577  | 4.209603  | 0.501476  |
| H | 2.454615  | -1.563430 | 0.884674  |
| H | 3.126317  | -0.004729 | 0.305012  |
| H | 1.089041  | 0.452047  | -0.978852 |
| H | 1.256961  | -1.292716 | -1.247060 |
| H | -1.043101 | -0.331366 | -0.096010 |
| H | -0.310106 | -1.814758 | 0.523614  |
| H | -0.067373 | -0.661978 | 2.564280  |
| H | -0.284791 | 0.929755  | 1.798856  |
| H | 3.315462  | 2.104946  | 6.190834  |
| H | 1.664939  | 4.463227  | 3.065802  |
| H | 0.537310  | 2.871863  | 3.555482  |
| H | 0.670528  | 3.458173  | 1.636707  |
| H | -0.345939 | 4.593190  | 2.960251  |
| H | 5.217456  | 0.835593  | 2.687603  |
| H | 5.552524  | -0.152282 | 4.141616  |
| H | 4.966545  | 0.808183  | 6.407266  |

### Dimer 2b

114

scf done: -1825.674721

|   |          |           |           |
|---|----------|-----------|-----------|
| C | 7.445945 | 11.204163 | 9.255697  |
| C | 7.123280 | 11.119412 | 7.871669  |
| C | 6.220796 | 12.175244 | 7.563251  |
| C | 5.990205 | 12.918231 | 8.754711  |
| C | 6.744261 | 12.316507 | 9.803380  |
| C | 8.243951 | 10.185388 | 10.020141 |
| H | 7.653417 | 9.281498  | 10.228613 |
| H | 8.577619 | 10.567917 | 10.990427 |
| H | 9.136868 | 9.856892  | 9.474360  |
| C | 7.547542 | 10.015309 | 6.945492  |
| H | 8.554647 | 9.650909  | 7.175866  |
| H | 7.552070 | 10.338463 | 5.898314  |
| H | 6.872328 | 9.148981  | 7.005376  |
| C | 5.522357 | 12.389009 | 6.250835  |
| H | 6.118662 | 12.026848 | 5.406650  |

|    |           |           |           |
|----|-----------|-----------|-----------|
| H  | 5.313415  | 13.447419 | 6.062139  |
| H  | 4.559169  | 11.859549 | 6.211807  |
| C  | 5.004542  | 14.042964 | 8.902681  |
| H  | 4.977105  | 14.690362 | 8.018069  |
| H  | 5.233303  | 14.679191 | 9.764964  |
| H  | 3.979615  | 13.673479 | 9.052327  |
| C  | 6.657994  | 12.676963 | 11.259913 |
| H  | 6.521035  | 13.753076 | 11.416658 |
| H  | 7.555050  | 12.380911 | 11.815005 |
| H  | 5.810009  | 12.180611 | 11.753442 |
| C  | 8.042936  | 16.346646 | 10.233883 |
| H  | 8.621574  | 15.672705 | 10.867682 |
| H  | 6.974618  | 16.208789 | 10.447684 |
| C  | 8.440541  | 17.831090 | 10.351814 |
| H  | 7.672774  | 18.396156 | 10.887646 |
| H  | 9.378010  | 17.955253 | 10.900476 |
| C  | 8.584076  | 18.295015 | 8.884711  |
| H  | 9.637227  | 18.430760 | 8.622454  |
| H  | 8.066464  | 19.236795 | 8.684019  |
| C  | 7.993167  | 17.134739 | 8.087654  |
| H  | 6.901550  | 17.227613 | 7.990562  |
| H  | 8.424656  | 16.988720 | 7.097761  |
| C  | 10.719525 | 12.915188 | 11.065179 |
| H  | 10.818464 | 11.970287 | 10.519919 |
| H  | 9.938626  | 12.811008 | 11.823740 |
| C  | 12.060243 | 13.375214 | 11.627927 |
| H  | 12.690311 | 12.534258 | 11.929113 |
| H  | 11.914661 | 14.020983 | 12.501606 |
| C  | 12.634409 | 14.175529 | 10.457416 |
| H  | 13.412062 | 14.884856 | 10.753016 |
| H  | 13.045118 | 13.503653 | 9.697284  |
| C  | 11.390997 | 14.867128 | 9.918931  |
| H  | 11.173394 | 15.794383 | 10.466579 |
| H  | 11.448887 | 15.092631 | 8.850682  |
| B  | 8.676398  | 14.673881 | 5.435002  |
| O  | 8.301426  | 15.974771 | 8.873654  |
| O  | 10.307970 | 13.938268 | 10.130355 |
| Sr | 8.685708  | 13.463878 | 8.049552  |
| H  | 7.648909  | 15.016242 | 5.995040  |
| H  | 9.653861  | 15.020216 | 6.108273  |
| H  | 8.671078  | 13.440544 | 5.354332  |
| H  | 8.765117  | 15.165878 | 4.326071  |
| C  | 12.414387 | 15.707836 | 3.282811  |
| C  | 12.737051 | 15.792588 | 4.666839  |
| C  | 13.639535 | 14.736756 | 4.975257  |
| C  | 13.870126 | 13.993768 | 3.783797  |
| C  | 13.116071 | 14.595492 | 2.735128  |
| C  | 11.616381 | 16.726612 | 2.518367  |

|    |           |           |          |
|----|-----------|-----------|----------|
| H  | 12.206915 | 17.630502 | 2.309895 |
| H  | 11.282713 | 16.344083 | 1.548081 |
| H  | 10.723463 | 17.055108 | 3.064148 |
| C  | 12.312790 | 16.896690 | 5.593016 |
| H  | 11.305684 | 17.261091 | 5.362642 |
| H  | 12.308261 | 16.573536 | 6.640194 |
| H  | 12.988003 | 17.763019 | 5.533133 |
| C  | 14.337974 | 14.522990 | 6.287674 |
| H  | 13.741668 | 14.885152 | 7.131858 |
| H  | 14.546916 | 13.464581 | 6.476369 |
| H  | 15.301162 | 15.052450 | 6.326701 |
| C  | 14.855789 | 12.869035 | 3.635827 |
| H  | 14.883225 | 12.221637 | 4.520439 |
| H  | 14.627028 | 12.232809 | 2.773545 |
| H  | 15.880716 | 13.238520 | 3.486181 |
| C  | 13.202337 | 14.235037 | 1.278596 |
| H  | 13.339297 | 13.158924 | 1.121850 |
| H  | 12.305281 | 14.531089 | 0.723503 |
| H  | 14.050323 | 14.731389 | 0.785066 |
| C  | 11.817395 | 10.565354 | 2.304625 |
| H  | 11.238757 | 11.239295 | 1.670825 |
| H  | 12.885713 | 10.703211 | 2.090823 |
| C  | 11.419790 | 9.080910  | 2.186694 |
| H  | 12.187556 | 8.515844  | 1.650862 |
| H  | 10.482320 | 8.956748  | 1.638032 |
| C  | 11.276255 | 8.616985  | 3.653797 |
| H  | 10.223104 | 8.481240  | 3.916054 |
| H  | 11.793867 | 7.675205  | 3.854488 |
| C  | 11.867165 | 9.777261  | 4.450853 |
| H  | 12.958781 | 9.684387  | 4.547945 |
| H  | 11.435675 | 9.923280  | 5.440747 |
| C  | 9.140807  | 13.996813 | 1.473328 |
| H  | 9.041868  | 14.941713 | 2.018589 |
| H  | 9.921706  | 14.100992 | 0.714768 |
| C  | 7.800089  | 13.536787 | 0.910580 |
| H  | 7.170021  | 14.377743 | 0.609395 |
| H  | 7.945670  | 12.891018 | 0.036902 |
| C  | 7.225922  | 12.736471 | 2.081091 |
| H  | 6.448269  | 12.027145 | 1.785491 |
| H  | 6.815213  | 13.408348 | 2.841223 |
| C  | 8.469334  | 12.044873 | 2.619576 |
| H  | 8.686937  | 11.117617 | 2.071929 |
| H  | 8.411443  | 11.819369 | 3.687826 |
| B  | 11.183932 | 12.238119 | 7.103506 |
| O  | 11.558905 | 10.937229 | 3.664854 |
| O  | 9.552361  | 12.973732 | 2.408153 |
| Sr | 11.174623 | 13.448122 | 4.488956 |
| H  | 12.211422 | 11.895757 | 6.543469 |

|   |           |           |          |
|---|-----------|-----------|----------|
| H | 10.206470 | 11.891784 | 6.430235 |
| H | 11.189253 | 13.471456 | 7.184175 |
| H | 11.095213 | 11.746122 | 8.212437 |

### Monomer 2b

31

scf done: -448.027046

|    |            |          |           |
|----|------------|----------|-----------|
| C  | -8.724148  | 5.869938 | 3.855477  |
| C  | -9.483979  | 6.611046 | 2.903491  |
| C  | -10.846474 | 6.205199 | 3.014988  |
| C  | -10.928404 | 5.213243 | 4.035980  |
| C  | -9.616764  | 5.005590 | 4.555199  |
| C  | -8.962656  | 7.717793 | 2.028086  |
| C  | -12.010310 | 6.812190 | 2.280130  |
| C  | -12.192918 | 4.590949 | 4.562039  |
| C  | -9.260418  | 4.128290 | 5.724173  |
| C  | -7.263141  | 6.059926 | 4.158928  |
| Sr | -9.530688  | 4.013876 | 1.987187  |
| B  | -9.062480  | 2.109332 | 0.216343  |
| H  | -8.989280  | 1.672619 | 1.381907  |
| H  | -8.849990  | 1.244670 | -0.588612 |
| H  | -10.200707 | 2.597051 | 0.068780  |
| H  | -11.733240 | 7.171321 | 1.282506  |
| H  | -12.837969 | 6.105279 | 2.152953  |
| H  | -12.419351 | 7.677063 | 2.819995  |
| H  | -9.014678  | 8.690611 | 2.535716  |
| H  | -7.913688  | 7.568964 | 1.748209  |
| H  | -9.535697  | 7.820502 | 1.099618  |
| H  | -6.794332  | 5.146019 | 4.540896  |
| H  | -6.691545  | 6.375554 | 3.278903  |
| H  | -7.108844  | 6.832653 | 4.924347  |
| H  | -9.916752  | 3.254496 | 5.805163  |
| H  | -8.230648  | 3.757700 | 5.669305  |
| H  | -9.346040  | 4.671574 | 6.675117  |
| H  | -12.969058 | 4.508902 | 3.792789  |
| H  | -12.026732 | 3.585703 | 4.965566  |
| H  | -12.624652 | 5.186402 | 5.377994  |
| H  | -8.238495  | 3.039344 | 0.111304  |

### Adduct of $\epsilon$ -CL to monomer 2b

49

scf done: -833.042082

|   |            |          |          |
|---|------------|----------|----------|
| C | -8.652522  | 6.026097 | 3.879472 |
| C | -9.425576  | 6.793802 | 2.960675 |
| C | -10.733778 | 6.231795 | 2.907776 |
| C | -10.767661 | 5.113623 | 3.790328 |
| C | -9.481176  | 4.987187 | 4.390959 |
| C | -8.983055  | 8.056724 | 2.275071 |

|    |            |          |           |
|----|------------|----------|-----------|
| C  | -11.904412 | 6.791089 | 2.148140  |
| C  | -11.982682 | 4.289790 | 4.117246  |
| C  | -9.096410  | 4.002235 | 5.459936  |
| C  | -7.248416  | 6.328568 | 4.322325  |
| Sr | -9.111368  | 4.326317 | 1.707563  |
| O  | -6.697265  | 3.263381 | 1.917906  |
| C  | -6.075341  | 3.774273 | 0.999276  |
| C  | -4.726890  | 3.310693 | 0.518377  |
| C  | -4.724295  | 2.765769 | -0.941129 |
| C  | -6.002295  | 3.044672 | -1.739041 |
| C  | -6.290271  | 4.525385 | -2.010299 |
| C  | -6.071025  | 5.412351 | -0.793725 |
| O  | -6.651217  | 4.837020 | 0.403469  |
| B  | -9.972136  | 3.382923 | -0.649037 |
| H  | -5.008741  | 5.598500 | -0.605825 |
| H  | -6.568798  | 6.377540 | -0.896557 |
| H  | -5.637497  | 4.908728 | -2.805130 |
| H  | -7.322985  | 4.626820 | -2.357029 |
| H  | -6.863531  | 2.609056 | -1.217350 |
| H  | -5.945454  | 2.516968 | -2.696674 |
| H  | -3.853056  | 3.169911 | -1.468868 |
| H  | -4.581168  | 1.682349 | -0.894306 |
| H  | -4.032165  | 4.153005 | 0.619981  |
| H  | -4.403314  | 2.545638 | 1.225401  |
| H  | -10.870706 | 3.337043 | 0.206185  |
| H  | -10.358427 | 2.964898 | -1.710995 |
| H  | -9.596967  | 4.566165 | -0.741904 |
| H  | -7.901401  | 8.073642 | 2.097165  |
| H  | -9.475620  | 8.199150 | 1.306069  |
| H  | -9.213078  | 8.948276 | 2.875475  |
| H  | -7.230670  | 6.977911 | 5.209068  |
| H  | -6.693117  | 5.421385 | 4.586600  |
| H  | -6.673967  | 6.847249 | 3.545948  |
| H  | -9.662080  | 3.066274 | 5.385047  |
| H  | -8.032282  | 3.742360 | 5.420243  |
| H  | -9.285154  | 4.399293 | 6.467276  |
| H  | -12.664948 | 4.204289 | 3.264341  |
| H  | -11.723034 | 3.271247 | 4.428306  |
| H  | -12.561661 | 4.729434 | 4.941445  |
| H  | -11.592184 | 7.327477 | 1.245483  |
| H  | -12.604275 | 6.010587 | 1.830925  |
| H  | -12.478519 | 7.504069 | 2.756653  |
| H  | -9.014051  | 2.712100 | -0.224127 |

### Nucleophilic Attack TS for 2b

49

scf done: -832.986780

|    |           |          |          |
|----|-----------|----------|----------|
| Sr | -8.646219 | 6.325431 | 4.248707 |
|----|-----------|----------|----------|

|   |            |          |          |
|---|------------|----------|----------|
| O | -9.617350  | 7.314116 | 2.376710 |
| C | -10.763390 | 6.686266 | 2.237820 |
| H | -10.716652 | 5.805325 | 1.542866 |
| O | -11.052264 | 5.918929 | 3.584169 |
| C | -12.253380 | 6.179450 | 4.299802 |
| H | -12.431971 | 7.261164 | 4.356318 |
| H | -12.085615 | 5.837820 | 5.329107 |
| C | -13.473384 | 5.472503 | 3.708484 |
| H | -14.373725 | 5.949514 | 4.118969 |
| H | -13.492998 | 4.427670 | 4.041334 |
| C | -13.501884 | 5.498188 | 2.179343 |
| H | -12.738919 | 4.803661 | 1.809709 |
| H | -14.461691 | 5.093241 | 1.836011 |
| C | -13.284406 | 6.869880 | 1.529228 |
| H | -14.114343 | 7.537417 | 1.794635 |
| H | -13.354180 | 6.730518 | 0.443723 |
| C | -11.949481 | 7.572355 | 1.859002 |
| H | -12.067172 | 8.322974 | 2.648676 |
| H | -11.599338 | 8.133304 | 0.986520 |
| B | -9.974432  | 3.744873 | 2.021313 |
| H | -8.948349  | 4.249431 | 2.397974 |
| H | -10.191891 | 3.727527 | 0.848307 |
| H | -10.657029 | 3.144387 | 2.790771 |
| C | -8.257470  | 6.222998 | 7.016169 |
| C | -7.540070  | 5.094398 | 6.526686 |
| C | -6.421740  | 5.571398 | 5.783545 |
| C | -6.445545  | 6.995880 | 5.816758 |
| C | -7.581863  | 7.399559 | 6.576447 |
| C | -9.439112  | 6.180402 | 7.945437 |
| C | -7.839355  | 3.654811 | 6.842314 |
| C | -5.336622  | 4.721764 | 5.180782 |
| C | -5.391445  | 7.909285 | 5.253570 |
| C | -7.926321  | 8.811860 | 6.963151 |
| H | -10.092093 | 7.053112 | 7.828825 |
| H | -10.056773 | 5.288189 | 7.790207 |
| H | -9.127831  | 6.163894 | 8.999402 |
| H | -7.425180  | 9.111551 | 7.894237 |
| H | -7.624601  | 9.537970 | 6.199561 |
| H | -9.001003  | 8.947147 | 7.131513 |
| H | -4.902260  | 7.484439 | 4.369286 |
| H | -5.797530  | 8.884879 | 4.962185 |
| H | -4.594537  | 8.109030 | 5.983462 |
| H | -5.706170  | 3.740768 | 4.860144 |
| H | -4.872558  | 5.195375 | 4.307605 |
| H | -4.525189  | 4.529089 | 5.896467 |
| H | -8.909814  | 3.476760 | 6.997157 |
| H | -7.510123  | 2.976708 | 6.046432 |
| H | -7.332936  | 3.325578 | 7.760493 |

### Borate complex for 2b

49

scf done: -833.059155

|    |            |           |           |
|----|------------|-----------|-----------|
| Sr | -6.559552  | 7.142337  | -0.371482 |
| O  | -8.123378  | 5.388031  | -1.424720 |
| C  | -9.056207  | 5.265474  | -2.497990 |
| H  | -8.515443  | 5.031839  | -3.425177 |
| H  | -9.484975  | 6.264887  | -2.619550 |
| C  | -10.164502 | 4.247128  | -2.271955 |
| H  | -10.790944 | 4.280163  | -3.173426 |
| H  | -10.800473 | 4.570517  | -1.440085 |
| C  | -9.672697  | 2.806354  | -2.037525 |
| H  | -9.576798  | 2.617120  | -0.962616 |
| H  | -10.439927 | 2.106729  | -2.387946 |
| C  | -8.345481  | 2.479166  | -2.732946 |
| H  | -8.170504  | 1.401863  | -2.644005 |
| H  | -8.449898  | 2.671635  | -3.808105 |
| C  | -7.107507  | 3.238023  | -2.184808 |
| H  | -6.375197  | 2.527519  | -1.790004 |
| H  | -6.588473  | 3.787305  | -2.979225 |
| C  | -7.351693  | 4.201244  | -1.030210 |
| H  | -7.916002  | 3.719084  | -0.220924 |
| O  | -6.160759  | 4.697661  | -0.547406 |
| B  | -6.027231  | 4.832293  | 0.975676  |
| H  | -5.075771  | 5.607924  | 1.137426  |
| H  | -5.847962  | 3.779045  | 1.538130  |
| H  | -7.061043  | 5.390518  | 1.408450  |
| C  | -5.290421  | 9.608661  | -0.523923 |
| C  | -6.410480  | 9.838512  | 0.326710  |
| C  | -7.591881  | 9.737332  | -0.463632 |
| C  | -7.201732  | 9.447956  | -1.803626 |
| C  | -5.779412  | 9.365914  | -1.840461 |
| C  | -3.844331  | 9.723439  | -0.126367 |
| C  | -4.939687  | 9.185509  | -3.075321 |
| C  | -8.116675  | 9.387642  | -2.995072 |
| C  | -8.993310  | 10.016947 | 0.005675  |
| C  | -6.348568  | 10.235162 | 1.776192  |
| H  | -5.482627  | 9.801590  | 2.289125  |
| H  | -6.269867  | 11.324681 | 1.895677  |
| H  | -7.241528  | 9.924800  | 2.330521  |
| H  | -3.193087  | 9.084166  | -0.733493 |
| H  | -3.472213  | 10.750504 | -0.245286 |
| H  | -3.679432  | 9.450422  | 0.921870  |
| H  | -5.440929  | 8.572376  | -3.833600 |
| H  | -4.710341  | 10.147312 | -3.555051 |
| H  | -3.976590  | 8.709648  | -2.857772 |
| H  | -9.129832  | 9.070290  | -2.722946 |

|   |           |           |           |
|---|-----------|-----------|-----------|
| H | -8.218996 | 10.369807 | -3.477751 |
| H | -7.754206 | 8.699221  | -3.767653 |
| H | -9.130271 | 9.780125  | 1.066860  |
| H | -9.258473 | 11.076671 | -0.114079 |
| H | -9.742763 | 9.444279  | -0.553177 |

### Ring Opening TS for 2b

49

scf done: -832.992849

|    |            |           |           |
|----|------------|-----------|-----------|
| Sr | -6.860665  | 7.276815  | -1.005515 |
| O  | -8.315779  | 5.645161  | -1.730795 |
| C  | -9.085894  | 5.195568  | -2.796582 |
| H  | -8.451682  | 4.755368  | -3.592968 |
| H  | -9.600704  | 6.040916  | -3.288420 |
| C  | -10.148690 | 4.155805  | -2.413526 |
| H  | -10.528385 | 3.698671  | -3.338377 |
| H  | -11.002580 | 4.662912  | -1.945689 |
| C  | -9.671259  | 3.067125  | -1.446114 |
| H  | -9.564635  | 3.513440  | -0.450755 |
| H  | -10.472421 | 2.325015  | -1.339164 |
| C  | -8.384782  | 2.307830  | -1.806444 |
| H  | -8.246369  | 1.510237  | -1.065310 |
| H  | -8.510970  | 1.801599  | -2.771450 |
| C  | -7.092958  | 3.137811  | -1.873766 |
| H  | -6.213223  | 2.485149  | -1.864785 |
| H  | -7.028463  | 3.705686  | -2.807001 |
| C  | -6.950295  | 4.138443  | -0.771188 |
| H  | -7.722513  | 4.247246  | -0.015503 |
| O  | -5.906128  | 4.959245  | -0.732135 |
| B  | -5.278129  | 4.043590  | 0.378389  |
| H  | -4.262685  | 3.553006  | -0.039892 |
| H  | -6.127785  | 3.111899  | 0.415688  |
| H  | -5.301084  | 4.612721  | 1.443745  |
| C  | -5.459346  | 9.639001  | -0.483347 |
| C  | -6.649410  | 9.736017  | 0.293425  |
| C  | -7.750868  | 9.878649  | -0.601671 |
| C  | -7.241506  | 9.864775  | -1.931442 |
| C  | -5.825006  | 9.711486  | -1.858845 |
| C  | -4.057082  | 9.580384  | 0.056685  |
| C  | -4.873266  | 9.757256  | -3.023067 |
| C  | -8.040334  | 10.097214 | -3.184012 |
| C  | -9.181747  | 10.124379 | -0.208803 |
| C  | -6.716916  | 9.801716  | 1.794791  |
| H  | -5.921569  | 9.218076  | 2.273131  |
| H  | -6.610580  | 10.831839 | 2.162252  |
| H  | -7.671785  | 9.430917  | 2.185403  |
| H  | -3.368529  | 9.072085  | -0.627969 |
| H  | -3.644088  | 10.584741 | 0.224644  |



|   |           |           |           |
|---|-----------|-----------|-----------|
| H | -4.002216 | 9.057251  | 1.018444  |
| H | -5.314804 | 9.348372  | -3.939553 |
| H | -4.568188 | 10.786398 | -3.258361 |
| H | -3.951411 | 9.197064  | -2.828278 |
| H | -9.068943 | 9.730086  | -3.094072 |
| H | -8.109447 | 11.166332 | -3.428916 |
| H | -7.596039 | 9.606735  | -4.057825 |
| H | -9.432150 | 9.667681  | 0.755626  |
| H | -9.397262 | 11.197457 | -0.110368 |
| H | -9.889404 | 9.729933  | -0.946876 |

### Product for 2b

49

scf done: -833.061119

|    |            |           |           |
|----|------------|-----------|-----------|
| Sr | -7.197503  | 7.215212  | -1.738353 |
| O  | -8.794991  | 5.868982  | -2.413254 |
| C  | -9.705167  | 4.932290  | -2.859578 |
| H  | -9.219282  | 4.179747  | -3.516896 |
| H  | -10.490272 | 5.391302  | -3.489730 |
| C  | -10.420142 | 4.169915  | -1.731644 |
| H  | -11.024755 | 3.370765  | -2.185952 |
| H  | -11.126340 | 4.851722  | -1.238678 |
| C  | -9.521015  | 3.571234  | -0.641599 |
| H  | -9.074150  | 4.397007  | -0.072601 |
| H  | -10.164681 | 3.043498  | 0.073514  |
| C  | -8.419772  | 2.603577  | -1.106903 |
| H  | -8.140873  | 1.942846  | -0.273617 |
| H  | -8.821642  | 1.942262  | -1.884732 |
| C  | -7.153678  | 3.283547  | -1.653563 |
| H  | -6.514540  | 2.552563  | -2.163784 |
| H  | -7.446911  | 4.046382  | -2.380094 |
| C  | -6.348124  | 3.979650  | -0.565559 |
| H  | -7.003615  | 4.408277  | 0.198487  |
| O  | -5.606627  | 5.101580  | -1.119252 |
| B  | -4.266905  | 5.047351  | -1.313249 |
| H  | -3.647971  | 4.075712  | -0.985220 |
| H  | -5.637978  | 3.308947  | -0.070644 |
| H  | -3.767103  | 6.008289  | -1.822414 |
| C  | -5.722468  | 9.146814  | -0.286055 |
| C  | -7.073316  | 9.271889  | 0.151452  |
| C  | -7.840792  | 9.793251  | -0.930482 |
| C  | -6.965725  | 9.981039  | -2.038981 |
| C  | -5.656215  | 9.581941  | -1.639580 |
| C  | -4.553667  | 8.749401  | 0.572012  |
| C  | -4.404990  | 9.715058  | -2.463263 |
| C  | -7.334458  | 10.613455 | -3.353065 |
| C  | -9.292378  | 10.181886 | -0.877853 |
| C  | -7.571838  | 9.031662  | 1.550080  |

|   |           |           |           |
|---|-----------|-----------|-----------|
| H | -7.014802 | 8.236739  | 2.060685  |
| H | -7.475302 | 9.928903  | 2.177686  |
| H | -8.631115 | 8.750668  | 1.570516  |
| H | -3.752697 | 8.277471  | -0.008760 |
| H | -4.103266 | 9.616144  | 1.076182  |
| H | -4.839634 | 8.046067  | 1.363267  |
| H | -4.598807 | 9.599478  | -3.536420 |
| H | -3.935306 | 10.700867 | -2.338271 |
| H | -3.646594 | 8.972464  | -2.189033 |
| H | -8.370325 | 10.399690 | -3.640876 |
| H | -7.239400 | 11.707902 | -3.319339 |
| H | -6.692620 | 10.272240 | -4.173946 |
| H | -9.858864 | 9.570808  | -0.166196 |
| H | -9.423436 | 11.228233 | -0.567522 |
| H | -9.784727 | 10.079382 | -1.851547 |

### 3b

36

scf done: -390.400941

|    |            |           |           |
|----|------------|-----------|-----------|
| Sr | -10.127316 | 2.532580  | -0.534100 |
| B  | -8.935812  | 3.871243  | 1.429297  |
| H  | -8.512048  | 4.234546  | 0.316776  |
| H  | -10.164660 | 4.062231  | 1.447331  |
| H  | -8.744029  | 2.642368  | 1.520572  |
| H  | -8.387093  | 4.464171  | 2.320272  |
| Si | -8.596490  | 2.476794  | -4.138822 |
| H  | -8.568375  | 3.944691  | -3.841501 |
| H  | -7.185689  | 2.039309  | -4.428914 |
| H  | -9.371355  | 2.281063  | -5.414144 |
| N  | -9.310895  | 1.679587  | -2.760166 |
| P  | -9.581745  | 0.065693  | -2.602876 |
| C  | -10.301554 | -0.643459 | -4.155766 |
| H  | -9.581339  | -0.548368 | -4.973585 |
| H  | -11.202031 | -0.086689 | -4.421776 |
| H  | -10.547784 | -1.698226 | -4.010234 |
| C  | -8.031981  | -0.908137 | -2.380333 |
| H  | -7.548114  | -0.588411 | -1.454903 |
| H  | -8.251065  | -1.978041 | -2.331348 |
| H  | -7.362406  | -0.709868 | -3.220634 |
| C  | -10.508768 | -0.225270 | -1.120792 |
| H  | -10.179818 | -1.122767 | -0.598771 |
| P  | -12.242097 | 0.076212  | -0.918324 |
| N  | -12.491287 | 1.697088  | -0.803823 |
| C  | -13.353024 | -0.684200 | -2.191109 |
| H  | -13.225916 | -0.160450 | -3.140133 |
| H  | -13.111495 | -1.742548 | -2.317269 |
| H  | -14.396105 | -0.585092 | -1.876759 |
| Si | -14.040363 | 2.501993  | -0.811292 |

|   |            |           |           |
|---|------------|-----------|-----------|
| H | -13.782057 | 3.971739  | -0.681799 |
| H | -14.821543 | 2.282200  | -2.078685 |
| H | -14.944076 | 2.091587  | 0.320577  |
| C | -12.694219 | -0.837661 | 0.618538  |
| H | -12.053097 | -0.493921 | 1.433083  |
| H | -12.566834 | -1.914516 | 0.479520  |
| H | -13.735916 | -0.622185 | 0.868118  |

### Adduct of $\epsilon$ -CL to 3b

54

scf done: -775.408779

|    |            |           |           |
|----|------------|-----------|-----------|
| B  | -8.657116  | 4.428191  | 4.860152  |
| H  | -9.550568  | 5.284151  | 4.743744  |
| H  | -8.261130  | 4.131071  | 3.724592  |
| H  | -7.752292  | 4.837239  | 5.547610  |
| Sr | -10.707691 | 3.510384  | 3.342416  |
| O  | -12.061594 | 1.981807  | 5.045732  |
| C  | -12.322992 | 2.661559  | 6.026984  |
| C  | -12.831858 | 2.102629  | 7.331513  |
| C  | -11.880269 | 2.328923  | 8.543388  |
| C  | -10.708379 | 3.279043  | 8.276085  |
| C  | -11.103729 | 4.731902  | 7.991142  |
| C  | -12.294522 | 4.853934  | 7.052136  |
| O  | -12.162011 | 3.987201  | 5.903835  |
| N  | -12.533767 | 4.804392  | 2.096013  |
| Si | -14.188068 | 5.179339  | 2.476763  |
| P  | -11.734939 | 5.282505  | 0.739487  |
| C  | -10.173875 | 4.479588  | 0.640085  |
| P  | -9.859367  | 2.795236  | 0.235861  |
| C  | -10.565565 | 2.216988  | -1.379289 |
| C  | -12.819020 | 5.108519  | -0.755008 |
| C  | -11.326610 | 7.081893  | 0.753711  |
| C  | -8.039631  | 2.726789  | -0.056551 |
| N  | -10.346211 | 1.823447  | 1.468203  |
| Si | -10.415698 | 0.084044  | 1.414148  |
| H  | -9.166151  | 3.408822  | 5.357745  |
| H  | -11.490406 | -0.452350 | 0.504113  |
| H  | -14.483541 | 6.657279  | 2.558179  |
| H  | -15.191719 | 4.616763  | 1.504178  |
| H  | -14.502069 | 4.596448  | 3.821763  |
| H  | -9.133045  | -0.565519 | 0.957124  |
| H  | -10.705776 | -0.415180 | 2.795458  |
| H  | -9.364213  | 5.148757  | 0.358599  |
| H  | -7.761482  | 3.334849  | -0.921453 |
| H  | -7.535567  | 3.101428  | 0.837136  |
| H  | -7.745467  | 1.688547  | -0.227421 |
| H  | -10.281346 | 2.902358  | -2.181784 |
| H  | -10.194603 | 1.213649  | -1.609553 |

|   |            |          |           |
|---|------------|----------|-----------|
| H | -11.653714 | 2.174882 | -1.299797 |
| H | -13.694880 | 5.757376 | -0.661221 |
| H | -12.261461 | 5.376597 | -1.655785 |
| H | -13.160150 | 4.073779 | -0.827619 |
| H | -10.858580 | 7.382385 | -0.187377 |
| H | -12.243306 | 7.656073 | 0.907517  |
| H | -10.640764 | 7.270735 | 1.582571  |
| H | -13.239442 | 4.624137 | 7.556197  |
| H | -11.375063 | 5.249414 | 8.920589  |
| H | -12.374819 | 5.854584 | 6.625488  |
| H | -10.244201 | 5.254312 | 7.560718  |
| H | -10.030636 | 3.259817 | 9.136073  |
| H | -10.118498 | 2.905256 | 7.430096  |
| H | -12.468203 | 2.686451 | 9.396691  |
| H | -11.472748 | 1.356965 | 8.836805  |
| H | -13.813849 | 2.553417 | 7.519860  |
| H | -12.999833 | 1.039386 | 7.155037  |

### Nucleophilic Attack TS for 3b

54

scf done: -775.348373

|    |            |           |           |
|----|------------|-----------|-----------|
| B  | -8.770626  | 4.846781  | 4.782500  |
| H  | -9.652461  | 5.457800  | 4.245012  |
| H  | -8.375457  | 3.816936  | 4.315790  |
| H  | -8.161215  | 5.385118  | 5.653795  |
| Sr | -11.179417 | 3.423048  | 3.020356  |
| O  | -10.987656 | 3.083225  | 5.214537  |
| C  | -10.602760 | 3.438571  | 6.460563  |
| C  | -10.777888 | 2.288916  | 7.459869  |
| C  | -10.519246 | 2.618625  | 8.932554  |
| C  | -11.325603 | 3.812897  | 9.479973  |
| C  | -12.698116 | 3.974675  | 8.822339  |
| C  | -12.586093 | 4.471749  | 7.353821  |
| O  | -11.248855 | 4.642507  | 6.920844  |
| N  | -12.600690 | 4.994618  | 1.608202  |
| Si | -14.183133 | 5.687438  | 1.844099  |
| P  | -11.599175 | 5.301957  | 0.342507  |
| C  | -10.203215 | 4.218360  | 0.406117  |
| P  | -10.207949 | 2.494226  | 0.008894  |
| C  | -10.982328 | 2.045672  | -1.614166 |
| C  | -12.534682 | 5.314348  | -1.258491 |
| C  | -10.869886 | 6.996509  | 0.397017  |
| C  | -8.429378  | 2.079341  | -0.258952 |
| N  | -10.887605 | 1.640805  | 1.237209  |
| Si | -11.233857 | -0.068147 | 1.229203  |
| H  | -9.525107  | 3.757992  | 6.487418  |
| H  | -12.217622 | -0.482432 | 0.166857  |
| H  | -14.186594 | 7.192860  | 1.910186  |

|   |            |           |           |
|---|------------|-----------|-----------|
| H | -15.172841 | 5.316104  | 0.771480  |
| H | -14.713261 | 5.173852  | 3.147447  |
| H | -10.016740 | -0.933811 | 1.029043  |
| H | -11.826436 | -0.417597 | 2.559316  |
| H | -9.285869  | 4.710252  | 0.085744  |
| H | -8.032519  | 2.614989  | -1.125371 |
| H | -7.866969  | 2.357247  | 0.634967  |
| H | -8.334603  | 1.002846  | -0.419945 |
| H | -10.571605 | 2.665289  | -2.415179 |
| H | -10.791455 | 0.991429  | -1.834998 |
| H | -12.061726 | 2.194534  | -1.548094 |
| H | -13.265766 | 6.128221  | -1.254336 |
| H | -11.845870 | 5.449933  | -2.096144 |
| H | -13.069507 | 4.369413  | -1.370500 |
| H | -10.258379 | 7.185761  | -0.489243 |
| H | -11.678213 | 7.729984  | 0.446592  |
| H | -10.254377 | 7.083189  | 1.294900  |
| H | -13.121833 | 3.800997  | 6.667501  |
| H | -13.243253 | 3.022508  | 8.862638  |
| H | -13.046883 | 5.460792  | 7.260034  |
| H | -13.293438 | 4.688917  | 9.404194  |
| H | -11.451715 | 3.696936  | 10.563548 |
| H | -10.762865 | 4.738288  | 9.325117  |
| H | -10.757503 | 1.721414  | 9.519292  |
| H | -9.448704  | 2.802924  | 9.091706  |
| H | -11.800448 | 1.911658  | 7.324994  |
| H | -10.121042 | 1.473330  | 7.135957  |

### Borate complex of 3b

54

scf done: -775.415578

|    |            |          |          |
|----|------------|----------|----------|
| B  | -8.825805  | 4.729269 | 4.924481 |
| H  | -9.216173  | 5.709560 | 4.265874 |
| H  | -8.233177  | 3.963953 | 4.130752 |
| H  | -8.097706  | 5.070660 | 5.819343 |
| Sr | -10.555535 | 3.879982 | 3.036091 |
| O  | -10.085850 | 3.991792 | 5.403186 |
| C  | -10.145299 | 3.561555 | 6.734121 |
| C  | -11.187965 | 2.448512 | 6.827639 |
| C  | -11.521800 | 1.982813 | 8.248395 |
| C  | -11.945913 | 3.107014 | 9.213688 |
| C  | -12.682820 | 4.259237 | 8.526382 |
| C  | -11.735361 | 5.111522 | 7.638117 |
| O  | -10.402207 | 4.627824 | 7.620406 |
| N  | -12.407634 | 5.051418 | 1.783400 |
| Si | -13.983986 | 5.606977 | 2.278703 |
| P  | -11.730863 | 5.254225 | 0.298166 |
| C  | -10.219010 | 4.341904 | 0.209221 |

|    |            |           |           |
|----|------------|-----------|-----------|
| P  | -10.076058 | 2.586996  | 0.059573  |
| C  | -10.981493 | 1.818191  | -1.363591 |
| C  | -12.963901 | 4.903639  | -1.039855 |
| C  | -11.238822 | 6.999838  | -0.034944 |
| C  | -8.307170  | 2.301735  | -0.376572 |
| N  | -10.506411 | 1.884510  | 1.483097  |
| Si | -10.749692 | 0.180096  | 1.755724  |
| H  | -9.157038  | 3.199590  | 7.047025  |
| H  | -11.869942 | -0.409722 | 0.941542  |
| H  | -14.166058 | 7.098828  | 2.180607  |
| H  | -15.116555 | 4.992738  | 1.500039  |
| H  | -14.164100 | 5.222905  | 3.716429  |
| H  | -9.535494  | -0.666211 | 1.476523  |
| H  | -11.100356 | 0.003043  | 3.202414  |
| H  | -9.438140  | 4.876112  | -0.329405 |
| H  | -8.071848  | 2.736032  | -1.351875 |
| H  | -7.681195  | 2.760832  | 0.391640  |
| H  | -8.115363  | 1.226361  | -0.399419 |
| H  | -10.741735 | 2.347616  | -2.289137 |
| H  | -10.694296 | 0.767136  | -1.462209 |
| H  | -12.056031 | 1.868803  | -1.178096 |
| H  | -13.790122 | 5.617950  | -0.978132 |
| H  | -12.489636 | 4.981327  | -2.021320 |
| H  | -13.364352 | 3.897487  | -0.901298 |
| H  | -10.842454 | 7.103328  | -1.048461 |
| H  | -12.111694 | 7.646029  | 0.084645  |
| H  | -10.476203 | 7.290952  | 0.690629  |
| H  | -12.121051 | 5.200653  | 6.613547  |
| H  | -13.516066 | 3.864985  | 7.929689  |
| H  | -11.656808 | 6.127120  | 8.036658  |
| H  | -13.136898 | 4.900594  | 9.290793  |
| H  | -12.584014 | 2.683055  | 9.998199  |
| H  | -11.062330 | 3.515055  | 9.713023  |
| H  | -12.330906 | 1.245543  | 8.168663  |
| H  | -10.665435 | 1.444324  | 8.673004  |
| H  | -12.102644 | 2.804333  | 6.332917  |
| H  | -10.829946 | 1.598364  | 6.234150  |

### Ring Opening TS for 3b

54

scf done: -775.364738

|    |           |          |           |
|----|-----------|----------|-----------|
| C  | -7.368235 | 7.669929 | -1.197769 |
| Sr | -8.893971 | 5.185598 | -1.530857 |
| N  | -8.967644 | 6.929726 | -3.366484 |
| Si | -9.873118 | 7.005385 | -4.852866 |
| P  | -7.870772 | 8.041071 | -2.846122 |
| C  | -8.500751 | 9.762088 | -3.123890 |
| P  | -8.315810 | 7.897914 | 0.272304  |

|    |            |           |           |
|----|------------|-----------|-----------|
| N  | -9.507450  | 6.766852  | 0.355679  |
| Si | -10.796615 | 6.724221  | 1.527564  |
| C  | -6.305963  | 8.008757  | -3.823467 |
| C  | -7.088109  | 7.745849  | 1.640432  |
| C  | -9.007557  | 9.600152  | 0.520385  |
| O  | -9.731090  | 3.015347  | -1.683521 |
| C  | -10.512435 | 2.186893  | -2.474472 |
| C  | -10.935357 | 0.877248  | -1.790774 |
| C  | -9.829249  | 0.176192  | -0.994365 |
| C  | -8.492021  | -0.079584 | -1.705611 |
| C  | -7.705974  | 1.161766  | -2.154061 |
| C  | -7.679473  | 2.271882  | -1.148430 |
| O  | -7.079832  | 3.425433  | -1.436969 |
| B  | -5.866784  | 2.946898  | -0.583420 |
| H  | -6.349550  | 8.550414  | 1.591378  |
| H  | -9.997483  | 1.921753  | -3.421866 |
| H  | -8.210707  | 2.188678  | -0.205536 |
| H  | -9.014150  | 7.060450  | -6.090303 |
| H  | -10.806080 | 8.184093  | -4.942007 |
| H  | -10.706204 | 5.762450  | -4.939154 |
| H  | -6.542502  | 8.137483  | -4.882341 |
| H  | -5.826622  | 7.038091  | -3.678851 |
| H  | -5.629828  | 8.804479  | -3.499911 |
| H  | -8.648535  | 9.938529  | -4.193399 |
| H  | -9.461167  | 9.875632  | -2.617469 |
| H  | -7.788178  | 10.490856 | -2.729651 |
| H  | -6.301327  | 7.813532  | -1.039071 |
| H  | -9.798941  | 9.775343  | -0.211074 |
| H  | -9.436743  | 9.686971  | 1.523001  |
| H  | -8.219159  | 10.346721 | 0.396217  |
| H  | -7.613780  | 7.789566  | 2.597247  |
| H  | -6.585688  | 6.780242  | 1.551067  |
| H  | -10.321846 | 6.641672  | 2.955973  |
| H  | -11.618516 | 5.501911  | 1.253968  |
| H  | -11.716748 | 7.915085  | 1.465554  |
| H  | -6.673519  | 0.893913  | -2.403567 |
| H  | -8.127365  | 1.593373  | -3.066648 |
| H  | -7.857935  | -0.666646 | -1.028361 |
| H  | -8.654749  | -0.712489 | -2.587083 |
| H  | -9.647903  | 0.749409  | -0.078404 |
| H  | -10.211934 | -0.793789 | -0.651759 |
| H  | -11.333498 | 0.200204  | -2.560415 |
| H  | -11.762529 | 1.079639  | -1.097814 |
| H  | -11.433259 | 2.706455  | -2.800923 |
| H  | -6.264768  | 1.786245  | -0.267852 |
| H  | -4.905890  | 2.780855  | -1.290241 |
| H  | -5.780519  | 3.589090  | 0.435917  |

### Product for 3b

54

scf done: -775.429240

|    |            |           |           |
|----|------------|-----------|-----------|
| C  | -7.352145  | 7.488692  | -1.180145 |
| Sr | -8.910152  | 5.004232  | -1.871539 |
| N  | -8.802058  | 6.949006  | -3.515210 |
| Si | -9.610454  | 7.188492  | -5.041626 |
| P  | -7.769832  | 8.015104  | -2.809824 |
| C  | -8.419449  | 9.747654  | -2.948635 |
| P  | -8.388155  | 7.554898  | 0.243465  |
| N  | -9.541900  | 6.386803  | 0.176433  |
| Si | -10.878040 | 6.231958  | 1.286425  |
| C  | -6.148632  | 8.127355  | -3.686750 |
| C  | -7.230066  | 7.334784  | 1.665861  |
| C  | -9.150133  | 9.208412  | 0.601705  |
| O  | -10.123915 | 3.212602  | -2.317043 |
| C  | -10.775492 | 2.059975  | -2.697201 |
| C  | -11.136803 | 1.129228  | -1.526331 |
| C  | -10.003783 | 0.816521  | -0.540223 |
| C  | -8.725516  | 0.198023  | -1.131102 |
| C  | -7.770363  | 1.200794  | -1.797921 |
| C  | -7.101452  | 2.128139  | -0.795166 |
| O  | -6.719246  | 3.374918  | -1.435500 |
| B  | -5.436574  | 3.635818  | -1.773013 |
| H  | -6.523511  | 8.166900  | 1.725154  |
| H  | -10.169244 | 1.467034  | -3.417178 |
| H  | -7.793414  | 2.408073  | 0.004126  |
| H  | -8.667753  | 7.455273  | -6.189318 |
| H  | -10.587108 | 8.335506  | -5.040970 |
| H  | -10.371668 | 5.940866  | -5.362350 |
| H  | -6.329296  | 8.379168  | -4.734495 |
| H  | -5.654479  | 7.155134  | -3.631588 |
| H  | -5.512178  | 8.890476  | -3.230904 |
| H  | -8.488381  | 10.035482 | -4.001952 |
| H  | -9.418901  | 9.791657  | -2.511619 |
| H  | -7.757436  | 10.441642 | -2.424618 |
| H  | -6.304240  | 7.662547  | -0.942276 |
| H  | -9.908499  | 9.424245  | -0.153457 |
| H  | -9.634378  | 9.191514  | 1.582662  |
| H  | -8.383861  | 9.987508  | 0.587871  |
| H  | -7.809417  | 7.279917  | 2.590540  |
| H  | -6.684328  | 6.398718  | 1.529712  |
| H  | -10.450684 | 6.120000  | 2.729766  |
| H  | -11.628648 | 4.986097  | 0.938172  |
| H  | -11.848370 | 7.383192  | 1.237982  |
| H  | -6.997916  | 0.672255  | -2.370803 |
| H  | -8.338550  | 1.831677  | -2.486691 |
| H  | -8.184655  | -0.341871 | -0.340221 |



|   |            |           |           |
|---|------------|-----------|-----------|
| H | -8.999999  | -0.562986 | -1.872511 |
| H | -9.756583  | 1.739599  | -0.001295 |
| H | -10.397309 | 0.130840  | 0.221313  |
| H | -11.532454 | 0.189326  | -1.940579 |
| H | -11.955083 | 1.585620  | -0.953070 |
| H | -11.716692 | 2.276663  | -3.238732 |
| H | -6.208475  | 1.685309  | -0.340445 |
| H | -4.569125  | 2.853500  | -1.500873 |
| H | -5.233569  | 4.670056  | -2.339513 |

**1a**

37

scf done: -1196.902153

|    |           |           |           |
|----|-----------|-----------|-----------|
| C  | -0.501979 | 0.851199  | 0.455763  |
| C  | 0.033637  | -0.581871 | 0.509395  |
| O  | 1.457702  | -0.467949 | 0.776663  |
| C  | 1.805669  | 0.922337  | 0.962796  |
| C  | 0.754389  | 1.680875  | 0.171898  |
| Ca | 3.027554  | -2.144502 | 0.178475  |
| O  | 3.460577  | -3.507623 | 2.071343  |
| C  | 2.880083  | -4.828303 | 2.247948  |
| C  | 3.803498  | -5.567548 | 3.217911  |
| C  | 5.128277  | -4.811668 | 3.076736  |
| C  | 4.646996  | -3.383407 | 2.888320  |
| B  | 5.131448  | -0.829714 | 0.003449  |
| B  | 1.616225  | -3.660296 | -1.190176 |
| H  | 1.757551  | 1.163549  | 2.033451  |
| H  | 2.831234  | 1.054378  | 0.612285  |
| H  | 0.662231  | 2.723217  | 0.487874  |
| H  | -0.078786 | -1.115356 | -0.438429 |
| H  | -0.424021 | -1.180376 | 1.303199  |
| H  | -0.933515 | 1.138204  | 1.420593  |
| H  | -1.276485 | 0.968516  | -0.306219 |
| H  | 4.296807  | -0.482608 | -0.848958 |
| H  | 1.139700  | -3.502278 | -0.052529 |
| H  | 5.331475  | -2.045811 | -0.153041 |
| H  | 2.768131  | -4.104661 | -1.049631 |
| H  | 4.602669  | -0.682738 | 1.119301  |
| H  | 6.149354  | -0.197289 | -0.090002 |
| H  | 0.935933  | -4.394080 | -1.856332 |
| H  | 1.718946  | -2.534876 | -1.706796 |
| H  | 1.001503  | 1.664163  | -0.894932 |
| H  | 1.860347  | -4.712926 | 2.627288  |
| H  | 2.832783  | -5.300680 | 1.262723  |
| H  | 3.429581  | -5.486992 | 4.244287  |
| H  | 3.885258  | -6.629494 | 2.973178  |
| H  | 5.782005  | -4.922545 | 3.945710  |
| H  | 5.675826  | -5.145106 | 2.188735  |

|   |          |           |          |
|---|----------|-----------|----------|
| H | 4.373812 | -2.919829 | 3.845952 |
| H | 5.344101 | -2.729694 | 2.360140 |

**$\epsilon$ -CL adduct to 1a**

42

scf done: -1349.511042

|    |           |           |           |
|----|-----------|-----------|-----------|
| O  | -0.062171 | -0.019215 | 1.998827  |
| C  | 0.266346  | -0.315820 | 3.380329  |
| C  | -0.344873 | 0.815414  | 4.212368  |
| C  | -1.411761 | 1.397452  | 3.278540  |
| C  | -0.743489 | 1.248944  | 1.922218  |
| Ca | -0.035855 | -1.637319 | 0.259506  |
| O  | 1.447316  | -2.495326 | -1.814442 |
| C  | 1.453098  | -3.262736 | -3.041312 |
| C  | 0.837650  | -2.484071 | -4.198198 |
| C  | 1.236317  | -1.004627 | -4.217765 |
| C  | 2.731686  | -0.717366 | -4.033866 |
| C  | 3.334532  | -1.189756 | -2.678263 |
| C  | 2.291985  | -1.469003 | -1.633164 |
| O  | 2.139695  | -0.822685 | -0.605979 |
| B  | -1.728589 | -0.669191 | -1.314475 |
| B  | 0.100820  | -3.715878 | 1.614332  |
| H  | 4.000730  | -0.434862 | -2.258353 |
| H  | 3.926884  | -2.101848 | -2.814339 |
| H  | 0.880760  | -4.158044 | -2.796145 |
| H  | 2.879005  | 0.364085  | -4.109832 |
| H  | 3.308816  | -1.167176 | -4.849531 |
| H  | 2.482973  | -3.567338 | -3.250989 |
| H  | 0.909109  | -0.566842 | -5.166639 |
| H  | 0.665840  | -0.478704 | -3.441761 |
| H  | 1.147887  | -2.982814 | -5.125220 |
| H  | -0.253167 | -2.549352 | -4.143829 |
| H  | 1.355010  | -0.375968 | 3.476862  |
| H  | -0.159524 | -1.295839 | 3.612091  |
| H  | -0.754211 | 0.451301  | 5.158043  |
| H  | 0.409302  | 1.575287  | 4.443543  |
| H  | -2.328459 | 0.799199  | 3.312001  |
| H  | -1.667619 | 2.434600  | 3.510811  |
| H  | -0.006802 | 2.045087  | 1.745755  |
| H  | -1.430069 | 1.201437  | 1.074308  |
| H  | -0.861381 | -3.009212 | 1.957677  |
| H  | -1.383771 | -1.807357 | -1.663733 |
| H  | -0.706545 | 0.036300  | -1.259781 |
| H  | -2.177930 | -0.761618 | -0.162108 |
| H  | -2.542917 | -0.203663 | -2.069381 |
| H  | 1.128298  | -3.024691 | 1.729459  |
| H  | -0.045187 | -3.967439 | 0.408032  |
| H  | 0.168942  | -4.721082 | 2.271760  |

### Nucleophilic Attack TS to 1a

42

scf done: -1349.461498

|    |           |           |           |
|----|-----------|-----------|-----------|
| O  | -1.002386 | -0.393526 | 1.560204  |
| C  | 0.008820  | -0.733819 | 2.535504  |
| C  | -0.063743 | 0.399586  | 3.543574  |
| C  | -1.575974 | 0.645236  | 3.631215  |
| C  | -2.075667 | 0.330453  | 2.213809  |
| Ca | -0.369226 | -0.228696 | -0.701502 |
| O  | 0.387485  | -2.274119 | -1.524598 |
| C  | 0.228347  | -3.336333 | -2.455273 |
| C  | 0.643576  | -2.970803 | -3.904989 |
| C  | 1.090620  | -1.514563 | -4.059723 |
| C  | 2.435983  | -1.184333 | -3.376551 |
| C  | 2.776739  | -2.060055 | -2.170686 |
| C  | 1.785021  | -1.978259 | -1.008260 |
| O  | 1.704542  | -0.795275 | -0.400575 |
| B  | -1.899813 | 1.469501  | -1.665500 |
| B  | 3.604915  | -2.803635 | 1.538252  |
| H  | 3.746823  | -1.760759 | -1.757943 |
| H  | 2.891069  | -3.106325 | -2.483090 |
| H  | -0.834287 | -3.598340 | -2.419626 |
| H  | 2.446692  | -0.131922 | -3.071484 |
| H  | 3.246358  | -1.296806 | -4.107037 |
| H  | 0.784469  | -4.211554 | -2.093000 |
| H  | 1.163667  | -1.283193 | -5.128600 |
| H  | 0.297542  | -0.859798 | -3.679630 |
| H  | 1.445339  | -3.638566 | -4.242806 |
| H  | -0.204964 | -3.153897 | -4.574000 |
| H  | 0.953707  | -0.824967 | 1.993675  |
| H  | -0.244240 | -1.699336 | 2.994498  |
| H  | 0.382710  | 0.136669  | 4.505978  |
| H  | 0.455316  | 1.282205  | 3.154678  |
| H  | -2.028327 | -0.037982 | 4.357244  |
| H  | -1.824262 | 1.665233  | 3.934716  |
| H  | -2.272495 | 1.224814  | 1.616341  |
| H  | -2.973902 | -0.295747 | 2.212878  |
| H  | 4.069621  | -1.722234 | 1.732499  |
| H  | -1.080863 | 1.043789  | -2.500230 |
| H  | -1.240359 | 1.928457  | -0.714079 |
| H  | -2.539448 | 0.491413  | -1.239941 |
| H  | -2.621394 | 2.302110  | -2.144667 |
| H  | 1.983788  | -2.829424 | -0.310403 |
| H  | 2.629263  | -3.155498 | 2.135055  |
| H  | 4.149078  | -3.566989 | 0.796321  |

### Borane complex of 1a

42

scf done: -1349.530455

|    |           |           |           |
|----|-----------|-----------|-----------|
| O  | -0.522489 | -0.262737 | 1.771139  |
| C  | -0.199608 | -1.044750 | 2.946635  |
| C  | -1.051195 | -0.462846 | 4.066907  |
| C  | -2.295683 | 0.005903  | 3.309358  |
| C  | -1.694325 | 0.556485  | 2.024411  |
| Ca | 0.782018  | -0.053564 | -0.213543 |
| O  | 0.960115  | -2.199414 | -1.229692 |
| C  | 0.231824  | -3.255129 | -1.856008 |
| C  | 0.106118  | -3.102641 | -3.392546 |
| C  | 0.659655  | -1.772631 | -3.911051 |
| C  | 2.199956  | -1.671623 | -3.858848 |
| C  | 2.862327  | -2.518743 | -2.769166 |
| C  | 2.418781  | -2.213526 | -1.348135 |
| O  | 2.802625  | -0.952560 | -0.947286 |
| B  | -0.640932 | 1.593696  | -1.394350 |
| B  | 3.124685  | -0.756228 | 0.540699  |
| H  | 3.948276  | -2.375269 | -2.787563 |
| H  | 2.694443  | -3.585163 | -2.966286 |
| H  | -0.755744 | -3.222333 | -1.387125 |
| H  | 2.495072  | -0.624241 | -3.736570 |
| H  | 2.617802  | -1.997098 | -4.819183 |
| H  | 0.688071  | -4.215502 | -1.581678 |
| H  | 0.326559  | -1.633787 | -4.945601 |
| H  | 0.207276  | -0.952729 | -3.343638 |
| H  | 0.610618  | -3.936835 | -3.894946 |
| H  | -0.952457 | -3.181248 | -3.664248 |
| H  | 0.877240  | -0.975717 | 3.117280  |
| H  | -0.456874 | -2.092477 | 2.746478  |
| H  | -1.266920 | -1.198370 | 4.846107  |
| H  | -0.542831 | 0.388262  | 4.533017  |
| H  | -2.956240 | -0.841480 | 3.094239  |
| H  | -2.874222 | 0.759814  | 3.849224  |
| H  | -1.370683 | 1.597180  | 2.137942  |
| H  | -2.347819 | 0.491437  | 1.152051  |
| H  | 2.922095  | 0.452491  | 0.737912  |
| H  | 0.377766  | 1.327256  | -2.049089 |
| H  | -0.264523 | 2.018069  | -0.287789 |
| H  | -1.242108 | 0.521654  | -1.193341 |
| H  | -1.339693 | 2.391834  | -1.959005 |
| H  | 2.788122  | -2.982202 | -0.649889 |
| H  | 2.280328  | -1.397113 | 1.191483  |
| H  | 4.247924  | -1.072816 | 0.845329  |

### Ring Opening TS to 1a

42

scf done: -1349.504742

|    |           |           |           |
|----|-----------|-----------|-----------|
| C  | -0.115775 | -0.728250 | 0.352318  |
| C  | 0.276243  | -0.029566 | 1.663775  |
| O  | 1.703914  | 0.206716  | 1.583802  |
| C  | 2.243233  | -0.519302 | 0.456964  |
| C  | 1.107177  | -0.516354 | -0.550709 |
| Ca | 2.845328  | 2.162033  | 2.279837  |
| O  | 4.433304  | 1.923995  | 0.951076  |
| C  | 5.769642  | 2.005501  | 0.618115  |
| C  | 6.436200  | 3.313444  | 1.091340  |
| C  | 6.114356  | 3.743462  | 2.525583  |
| C  | 6.804803  | 3.063374  | 3.718039  |
| C  | 6.699322  | 1.544046  | 3.941744  |
| C  | 5.350011  | 0.871265  | 3.721986  |
| O  | 4.211439  | 1.605594  | 4.241996  |
| B  | 3.892974  | 1.865229  | 5.560983  |
| B  | 1.118818  | 3.703015  | 3.195208  |
| H  | 7.051453  | 1.338379  | 4.961553  |
| H  | 7.391396  | 1.012715  | 3.275236  |
| H  | 5.926713  | 1.933354  | -0.474648 |
| H  | 6.424937  | 3.559913  | 4.619690  |
| H  | 7.876640  | 3.300331  | 3.685998  |
| H  | 6.343848  | 1.150968  | 1.041023  |
| H  | 6.352503  | 4.810684  | 2.618253  |
| H  | 5.027073  | 3.697816  | 2.662719  |
| H  | 7.523827  | 3.241831  | 0.944903  |
| H  | 6.088215  | 4.119959  | 0.432294  |
| H  | 2.496573  | -1.540859 | 0.774344  |
| H  | 3.150701  | 0.010442  | 0.153585  |
| H  | 1.057949  | 0.454221  | -1.055854 |
| H  | 1.214867  | -1.293442 | -1.312014 |
| H  | -1.033843 | -0.314813 | -0.072436 |
| H  | -0.279808 | -1.797189 | 0.522650  |
| H  | 0.069360  | -0.645429 | 2.545414  |
| H  | -0.204423 | 0.943690  | 1.795893  |
| H  | 3.180571  | 1.094645  | 6.145765  |
| H  | 2.237976  | 4.239875  | 3.131515  |
| H  | 1.226113  | 2.689765  | 3.909948  |
| H  | 0.836040  | 3.314939  | 2.045035  |
| H  | 0.289855  | 4.462824  | 3.619554  |
| H  | 5.142915  | 0.780446  | 2.653685  |
| H  | 5.344100  | -0.129491 | 4.170981  |
| H  | 4.317409  | 2.855849  | 6.087635  |

**Product from 1a**

42

scf done: -1349.528678

|   |           |           |          |
|---|-----------|-----------|----------|
| C | -0.123710 | -0.669522 | 0.447176 |
| C | 0.251552  | 0.058952  | 1.744655 |

|    |           |           |           |
|----|-----------|-----------|-----------|
| O  | 1.692757  | 0.226276  | 1.711366  |
| C  | 2.234851  | -0.503536 | 0.586241  |
| C  | 1.114405  | -0.481716 | -0.438434 |
| Ca | 2.830398  | 2.211136  | 2.343491  |
| O  | 4.416978  | 1.929862  | 1.023027  |
| C  | 5.739111  | 2.042111  | 0.647876  |
| C  | 6.397994  | 3.351144  | 1.129190  |
| C  | 6.097899  | 3.747027  | 2.577479  |
| C  | 6.807747  | 3.034890  | 3.738703  |
| C  | 6.748538  | 1.504619  | 3.897062  |
| C  | 5.412419  | 0.795555  | 3.709023  |
| O  | 4.275042  | 1.516209  | 4.275971  |
| B  | 4.036274  | 1.520252  | 5.613403  |
| B  | 1.010360  | 3.837104  | 2.814177  |
| H  | 7.142878  | 1.268922  | 4.893772  |
| H  | 7.430674  | 1.025508  | 3.183468  |
| H  | 5.861131  | 1.997103  | -0.450745 |
| H  | 6.424656  | 3.485840  | 4.663731  |
| H  | 7.873247  | 3.298907  | 3.713167  |
| H  | 6.341163  | 1.189214  | 1.032198  |
| H  | 6.333072  | 4.812493  | 2.694029  |
| H  | 5.012148  | 3.694022  | 2.727234  |
| H  | 7.483441  | 3.297745  | 0.961296  |
| H  | 6.026039  | 4.165700  | 0.493825  |
| H  | 2.469399  | -1.529473 | 0.903611  |
| H  | 3.152732  | 0.014945  | 0.294264  |
| H  | 1.089162  | 0.488534  | -0.945906 |
| H  | 1.220268  | -1.262517 | -1.196266 |
| H  | -1.033946 | -0.262481 | -0.000053 |
| H  | -0.292947 | -1.734164 | 0.639552  |
| H  | -0.015045 | -0.510677 | 2.641114  |
| H  | -0.187702 | 1.057630  | 1.818610  |
| H  | 4.755927  | 0.904462  | 6.347853  |
| H  | 2.138606  | 4.323496  | 3.011831  |
| H  | 0.901169  | 2.839723  | 3.547982  |
| H  | 0.988148  | 3.440044  | 1.634322  |
| H  | 0.143462  | 4.643280  | 3.023660  |
| H  | 5.166723  | 0.705159  | 2.649381  |
| H  | 5.442118  | -0.198339 | 4.167104  |
| H  | 3.086989  | 2.144375  | 5.981279  |

## 2a

31

scf done: -1094.795063

|   |            |          |          |
|---|------------|----------|----------|
| C | -8.719334  | 5.815646 | 3.816646 |
| C | -9.479186  | 6.561126 | 2.863948 |
| C | -10.843816 | 6.153542 | 2.971502 |
| C | -10.927460 | 5.155291 | 3.990207 |

|    |            |          |           |
|----|------------|----------|-----------|
| C  | -9.614578  | 4.948007 | 4.513607  |
| C  | -8.958764  | 7.681802 | 2.005629  |
| C  | -12.008924 | 6.775622 | 2.251009  |
| C  | -12.195131 | 4.547206 | 4.526060  |
| C  | -9.263194  | 4.080193 | 5.691280  |
| C  | -7.262813  | 6.017816 | 4.134597  |
| Ca | -9.547844  | 4.076374 | 2.046524  |
| B  | -9.060200  | 2.310065 | 0.354938  |
| H  | -8.993157  | 1.848579 | 1.510395  |
| H  | -8.828047  | 1.462410 | -0.456849 |
| H  | -10.204142 | 2.777702 | 0.191997  |
| H  | -11.734795 | 7.148724 | 1.257896  |
| H  | -12.839470 | 6.073602 | 2.116477  |
| H  | -12.409828 | 7.632467 | 2.808399  |
| H  | -9.013001  | 8.644665 | 2.530560  |
| H  | -7.909830  | 7.537742 | 1.723566  |
| H  | -9.531469  | 7.797562 | 1.078688  |
| H  | -6.790806  | 5.107983 | 4.521889  |
| H  | -6.685099  | 6.336330 | 3.259751  |
| H  | -7.125791  | 6.792861 | 4.900198  |
| H  | -9.920105  | 3.207382 | 5.776505  |
| H  | -8.233541  | 3.708626 | 5.643450  |
| H  | -9.353518  | 4.634046 | 6.635047  |
| H  | -12.975328 | 4.467083 | 3.760868  |
| H  | -12.035774 | 3.542971 | 4.934467  |
| H  | -12.614970 | 5.153322 | 5.339682  |
| H  | -8.244164  | 3.247051 | 0.265545  |

#### Adduct of $\epsilon$ -CL to monomer 2a

49

scf done: -1479.812653

|    |            |          |           |
|----|------------|----------|-----------|
| C  | -8.576583  | 5.815443 | 4.058147  |
| C  | -9.029364  | 6.685834 | 3.022560  |
| C  | -10.375576 | 6.335297 | 2.708660  |
| C  | -10.755742 | 5.248893 | 3.552265  |
| C  | -9.642249  | 4.924079 | 4.382202  |
| C  | -8.264118  | 7.852722 | 2.462648  |
| C  | -11.284107 | 7.061172 | 1.755199  |
| C  | -12.127310 | 4.638240 | 3.629829  |
| C  | -9.637238  | 3.916002 | 5.498582  |
| C  | -7.258886  | 5.913077 | 4.775107  |
| Ca | -8.911043  | 4.268002 | 1.913924  |
| O  | -6.510251  | 3.710841 | 1.922565  |
| C  | -6.105947  | 4.185844 | 0.870938  |
| C  | -4.745620  | 3.943680 | 0.283541  |
| C  | -4.775089  | 3.165651 | -1.066004 |
| C  | -6.158525  | 3.044541 | -1.715461 |
| C  | -6.794346  | 4.369025 | -2.152872 |

|   |            |          |           |
|---|------------|----------|-----------|
| C | -6.665751  | 5.472732 | -1.113307 |
| O | -6.967871  | 4.991458 | 0.221974  |
| B | -9.790005  | 2.697222 | 0.101421  |
| H | -5.663533  | 5.911890 | -1.098297 |
| H | -7.383850  | 6.277155 | -1.277033 |
| H | -6.323103  | 4.742457 | -3.071196 |
| H | -7.851616  | 4.195769 | -2.374320 |
| H | -6.845028  | 2.536235 | -1.026678 |
| H | -6.082901  | 2.387828 | -2.588154 |
| H | -4.069733  | 3.636135 | -1.760197 |
| H | -4.397989  | 2.156156 | -0.878981 |
| H | -4.258581  | 4.918235 | 0.160072  |
| H | -4.181399  | 3.398591 | 1.041361  |
| H | -10.571249 | 2.713864 | 1.060794  |
| H | -10.208896 | 1.986675 | -0.773347 |
| H | -9.651071  | 3.858858 | -0.319661 |
| H | -7.185957  | 7.657231 | 2.411706  |
| H | -8.595331  | 8.116915 | 1.451605  |
| H | -8.389085  | 8.754453 | 3.077816  |
| H | -7.314529  | 6.598810 | 5.631895  |
| H | -6.926594  | 4.945270 | 5.166809  |
| H | -6.460358  | 6.287977 | 4.124338  |
| H | -10.311486 | 3.075053 | 5.300562  |
| H | -8.639566  | 3.497362 | 5.675652  |
| H | -9.962963  | 4.361855 | 6.448418  |
| H | -12.629990 | 4.626556 | 2.656692  |
| H | -12.098591 | 3.603573 | 3.987982  |
| H | -12.777173 | 5.195094 | 4.318936  |
| H | -10.728900 | 7.559395 | 0.952179  |
| H | -12.006094 | 6.388420 | 1.279121  |
| H | -11.866112 | 7.841126 | 2.265237  |
| H | -8.689346  | 2.286366 | 0.502907  |

### Nucleophilic Attack TS to 2a

49

scf done: -1479.759714

|    |            |          |          |
|----|------------|----------|----------|
| Ca | -8.699762  | 6.267739 | 4.287857 |
| O  | -9.515873  | 7.375151 | 2.548235 |
| C  | -10.639678 | 6.740149 | 2.356346 |
| H  | -10.570525 | 5.857834 | 1.657906 |
| O  | -10.942294 | 5.918334 | 3.702673 |
| C  | -12.149101 | 6.159704 | 4.415033 |
| H  | -12.330584 | 7.240009 | 4.489740 |
| H  | -11.990252 | 5.801191 | 5.439671 |
| C  | -13.360011 | 5.460647 | 3.796353 |
| H  | -14.267171 | 5.937044 | 4.192151 |
| H  | -13.388811 | 4.413769 | 4.122097 |
| C  | -13.359887 | 5.492532 | 2.267026 |



|   |            |          |          |
|---|------------|----------|----------|
| H | -12.580135 | 4.809668 | 1.910896 |
| H | -14.307030 | 5.074495 | 1.904787 |
| C | -13.151565 | 6.867708 | 1.620727 |
| H | -14.001299 | 7.519345 | 1.861624 |
| H | -13.188130 | 6.725141 | 0.533950 |
| C | -11.843157 | 7.599958 | 1.984784 |
| H | -11.991245 | 8.325128 | 2.792503 |
| H | -11.499045 | 8.193397 | 1.131373 |
| B | -9.787107  | 3.855023 | 2.139404 |
| H | -8.781319  | 4.463851 | 2.407244 |
| H | -10.067800 | 3.741299 | 0.986045 |
| H | -10.361386 | 3.248271 | 2.987303 |
| C | -8.377769  | 6.215294 | 6.915566 |
| C | -7.673092  | 5.075675 | 6.424766 |
| C | -6.552325  | 5.541052 | 5.672929 |
| C | -6.566674  | 6.967920 | 5.698006 |
| C | -7.695629  | 7.384100 | 6.465022 |
| C | -9.555000  | 6.188075 | 7.851000 |
| C | -7.968005  | 3.640902 | 6.766904 |
| C | -5.466064  | 4.679510 | 5.089117 |
| C | -5.504958  | 7.871863 | 5.133860 |
| C | -8.032537  | 8.802031 | 6.836620 |
| H | -10.215542 | 7.052294 | 7.714442 |
| H | -10.165754 | 5.287164 | 7.721264 |
| H | -9.236676  | 6.200964 | 8.902332 |
| H | -7.521521  | 9.110314 | 7.758878 |
| H | -7.736799  | 9.516087 | 6.059694 |
| H | -9.105529  | 8.941450 | 7.011921 |
| H | -5.002761  | 7.430193 | 4.265760 |
| H | -5.908072  | 8.840186 | 4.816100 |
| H | -4.722188  | 8.084525 | 5.874620 |
| H | -5.839034  | 3.700171 | 4.767492 |
| H | -4.986169  | 5.145422 | 4.220781 |
| H | -4.669092  | 4.485343 | 5.819800 |
| H | -9.035836  | 3.465780 | 6.941246 |
| H | -7.652152  | 2.950776 | 5.975977 |
| H | -7.445860  | 3.328314 | 7.681506 |

### **Borane complex of 2a**

49

scf done: -1479.832151

|    |            |          |           |
|----|------------|----------|-----------|
| Ca | -6.709603  | 7.159956 | -0.402304 |
| O  | -8.148197  | 5.479955 | -1.350846 |
| C  | -9.048225  | 5.360802 | -2.453450 |
| H  | -8.476691  | 5.184699 | -3.374601 |
| H  | -9.516839  | 6.344829 | -2.549639 |
| C  | -10.111930 | 4.286788 | -2.285268 |
| H  | -10.703362 | 4.297240 | -3.210683 |

|   |            |           |           |
|---|------------|-----------|-----------|
| H | -10.794936 | 4.565311  | -1.474908 |
| C | -9.551831  | 2.874163  | -2.043842 |
| H | -9.447311  | 2.697255  | -0.967492 |
| H | -10.285285 | 2.136860  | -2.389151 |
| C | -8.210599  | 2.605068  | -2.737975 |
| H | -7.986363  | 1.537694  | -2.641248 |
| H | -8.323563  | 2.785630  | -3.814348 |
| C | -7.006693  | 3.423055  | -2.198489 |
| H | -6.221954  | 2.749089  | -1.842229 |
| H | -6.541222  | 4.024128  | -2.988467 |
| C | -7.281626  | 4.335354  | -1.012714 |
| H | -7.786796  | 3.797671  | -0.200138 |
| O | -6.118145  | 4.913541  | -0.551522 |
| B | -6.001623  | 5.090330  | 0.979164  |
| H | -5.742427  | 4.073128  | 1.569212  |
| H | -7.088586  | 5.561794  | 1.379072  |
| H | -5.120669  | 5.943050  | 1.114169  |
| C | -5.347303  | 9.421799  | -0.542325 |
| C | -6.446091  | 9.688319  | 0.328918  |
| C | -7.644301  | 9.640356  | -0.444145 |
| C | -7.285344  | 9.345706  | -1.794119 |
| C | -5.865878  | 9.206549  | -1.853194 |
| C | -3.892241  | 9.484656  | -0.167298 |
| C | -5.050759  | 9.010785  | -3.102174 |
| C | -8.217613  | 9.347457  | -2.973984 |
| C | -9.022212  | 9.992084  | 0.046573  |
| C | -6.345212  | 10.083429 | 1.776784  |
| H | -5.490667  | 9.613648  | 2.276112  |
| H | -6.220007  | 11.168843 | 1.890002  |
| H | -7.241578  | 9.810433  | 2.344920  |
| H | -3.272657  | 8.835776  | -0.796289 |
| H | -3.493959  | 10.502580 | -0.275482 |
| H | -3.719009  | 9.186384  | 0.872452  |
| H | -5.590381  | 8.438092  | -3.865454 |
| H | -4.781763  | 9.970774  | -3.563468 |
| H | -4.110353  | 8.483556  | -2.905452 |
| H | -9.239932  | 9.067489  | -2.694596 |
| H | -8.283289  | 10.343137 | -3.433685 |
| H | -7.894058  | 8.660264  | -3.764588 |
| H | -9.168906  | 9.726577  | 1.099800  |
| H | -9.216155  | 11.070310 | -0.034048 |
| H | -9.809960  | 9.489652  | -0.526699 |

### Ring Opening TS to 2a

49

scf done: -1479.765801

|    |           |          |           |
|----|-----------|----------|-----------|
| Ca | -7.030342 | 7.315944 | -1.008491 |
| O  | -8.405576 | 5.718148 | -1.603825 |

|   |            |           |           |
|---|------------|-----------|-----------|
| C | -9.069978  | 5.303759  | -2.749412 |
| H | -8.360176  | 4.969997  | -3.536729 |
| H | -9.616689  | 6.146867  | -3.211481 |
| C | -10.074223 | 4.166613  | -2.510640 |
| H | -10.340172 | 3.729829  | -3.483719 |
| H | -11.000784 | 4.581871  | -2.093624 |
| C | -9.589787  | 3.072138  | -1.553640 |
| H | -9.588793  | 3.482214  | -0.537193 |
| H | -10.339875 | 2.271378  | -1.536952 |
| C | -8.228248  | 2.423014  | -1.843856 |
| H | -8.078244  | 1.615017  | -1.116228 |
| H | -8.249458  | 1.939346  | -2.828362 |
| C | -7.003473  | 3.350114  | -1.801840 |
| H | -6.079951  | 2.762722  | -1.764655 |
| H | -6.931079  | 3.954615  | -2.710683 |
| C | -7.007419  | 4.315744  | -0.656592 |
| H | -7.811194  | 4.320894  | 0.072416  |
| O | -6.054507  | 5.253387  | -0.555804 |
| B | -5.348878  | 4.353216  | 0.504709  |
| H | -4.299702  | 3.951114  | 0.075214  |
| H | -6.137649  | 3.360664  | 0.477258  |
| H | -5.426422  | 4.848890  | 1.601710  |
| C | -5.493770  | 9.412602  | -0.536366 |
| C | -6.653749  | 9.588454  | 0.277328  |
| C | -7.767625  | 9.813985  | -0.585914 |
| C | -7.296982  | 9.775612  | -1.932850 |
| C | -5.892229  | 9.525677  | -1.902430 |
| C | -4.081004  | 9.274704  | -0.038954 |
| C | -4.970660  | 9.524143  | -3.091570 |
| C | -8.112302  | 10.079829 | -3.159398 |
| C | -9.164037  | 10.164737 | -0.150340 |
| C | -6.671660  | 9.668195  | 1.779495  |
| H | -5.886805  | 9.055613  | 2.237343  |
| H | -6.511268  | 10.696865 | 2.129696  |
| H | -7.628160  | 9.340857  | 2.203742  |
| H | -3.447962  | 8.711841  | -0.734152 |
| H | -3.605296  | 10.255537 | 0.095484  |
| H | -4.028781  | 8.764465  | 0.929229  |
| H | -5.462428  | 9.158067  | -4.000483 |
| H | -4.605730  | 10.534604 | -3.320273 |
| H | -4.083619  | 8.901397  | -2.928613 |
| H | -9.159859  | 9.777856  | -3.047588 |
| H | -8.117324  | 11.155193 | -3.383314 |
| H | -7.723534  | 9.576724  | -4.052204 |
| H | -9.424849  | 9.711927  | 0.813137  |
| H | -9.287932  | 11.249526 | -0.029988 |
| H | -9.919790  | 9.841197  | -0.875158 |

## Product from 2a

49

scf done: -1479.828268

|    |            |           |           |
|----|------------|-----------|-----------|
| Ca | -7.134798  | 7.211527  | -1.710517 |
| O  | -8.604527  | 5.953731  | -2.464848 |
| C  | -9.514813  | 5.045084  | -2.940755 |
| H  | -9.027625  | 4.260227  | -3.562891 |
| H  | -10.258281 | 5.511314  | -3.617440 |
| C  | -10.305910 | 4.322027  | -1.833910 |
| H  | -10.893607 | 3.512321  | -2.291869 |
| H  | -11.029861 | 5.025571  | -1.400223 |
| C  | -9.466404  | 3.759632  | -0.679125 |
| H  | -9.029620  | 4.608821  | -0.136513 |
| H  | -10.145590 | 3.276763  | 0.034738  |
| C  | -8.360776  | 2.756608  | -1.050271 |
| H  | -8.115595  | 2.143379  | -0.171178 |
| H  | -8.743605  | 2.055258  | -1.802228 |
| C  | -7.073173  | 3.394557  | -1.596697 |
| H  | -6.421927  | 2.631235  | -2.039155 |
| H  | -7.344237  | 4.111988  | -2.375378 |
| C  | -6.298153  | 4.162608  | -0.533951 |
| H  | -6.965780  | 4.574762  | 0.228598  |
| O  | -5.625202  | 5.314681  | -1.127034 |
| B  | -4.291702  | 5.307407  | -1.380143 |
| H  | -3.621713  | 4.369988  | -1.057576 |
| H  | -5.540910  | 3.552702  | -0.032044 |
| H  | -3.857811  | 6.274012  | -1.935244 |
| C  | -5.773010  | 9.000141  | -0.286543 |
| C  | -7.124397  | 9.071113  | 0.166004  |
| C  | -7.917812  | 9.595132  | -0.896855 |
| C  | -7.060852  | 9.835000  | -2.010837 |
| C  | -5.733990  | 9.467753  | -1.634714 |
| C  | -4.581439  | 8.642110  | 0.557266  |
| C  | -4.494222  | 9.692062  | -2.456439 |
| C  | -7.464713  | 10.482425 | -3.306935 |
| C  | -9.382020  | 9.928120  | -0.825424 |
| C  | -7.604117  | 8.776417  | 1.560895  |
| H  | -6.985509  | 8.021884  | 2.061214  |
| H  | -7.578974  | 9.671572  | 2.197237  |
| H  | -8.637731  | 8.411140  | 1.576552  |
| H  | -3.748962  | 8.258642  | -0.043651 |
| H  | -4.195874  | 9.513892  | 1.103480  |
| H  | -4.816598  | 7.881901  | 1.312016  |
| H  | -4.681241  | 9.583002  | -3.531343 |
| H  | -4.090578  | 10.703540 | -2.311592 |
| H  | -3.690338  | 8.994353  | -2.195379 |
| H  | -8.490678  | 10.227332 | -3.595742 |
| H  | -7.418182  | 11.578222 | -3.243366 |

|   |           |           |           |
|---|-----------|-----------|-----------|
| H | -6.812301 | 10.190224 | -4.138026 |
| H | -9.916027 | 9.291051  | -0.111672 |
| H | -9.544452 | 10.966500 | -0.505515 |
| H | -9.881004 | 9.813454  | -1.794164 |

### 3a

36

scf done: -1037.216091

|    |            |           |           |
|----|------------|-----------|-----------|
| Ca | -10.238266 | 2.444112  | -0.652777 |
| B  | -9.160581  | 3.794256  | 1.113340  |
| H  | -8.702922  | 4.065156  | -0.011001 |
| H  | -10.386751 | 3.996759  | 1.072135  |
| H  | -8.996005  | 2.571848  | 1.291398  |
| H  | -8.631775  | 4.442280  | 1.975890  |
| Si | -8.663437  | 2.511347  | -4.098408 |
| H  | -7.212553  | 2.173342  | -4.310580 |
| H  | -9.362961  | 2.206989  | -5.395808 |
| H  | -8.764613  | 3.984201  | -3.854416 |
| N  | -9.374399  | 1.699609  | -2.724765 |
| P  | -9.528900  | 0.075837  | -2.517704 |
| C  | -10.139310 | -0.745023 | -4.060517 |
| H  | -9.402870  | -0.622908 | -4.860004 |
| H  | -11.072922 | -0.274204 | -4.373395 |
| H  | -10.304386 | -1.809669 | -3.877570 |
| C  | -7.925075  | -0.776477 | -2.198791 |
| H  | -7.495199  | -0.380295 | -1.276367 |
| H  | -8.074419  | -1.855250 | -2.102678 |
| H  | -7.241779  | -0.574769 | -3.027256 |
| C  | -10.484328 | -0.204048 | -1.054952 |
| H  | -10.133857 | -1.053130 | -0.471047 |
| P  | -12.223845 | 0.080197  | -0.896693 |
| N  | -12.475185 | 1.704556  | -0.843738 |
| C  | -13.301774 | -0.722260 | -2.170061 |
| H  | -13.146419 | -0.231651 | -3.132655 |
| H  | -13.060591 | -1.784994 | -2.251850 |
| H  | -14.352480 | -0.608152 | -1.887966 |
| Si | -14.022506 | 2.515594  | -0.853956 |
| H  | -13.762190 | 3.988086  | -0.799553 |
| H  | -14.832224 | 2.233201  | -2.090757 |
| H  | -14.896587 | 2.153305  | 0.316295  |
| C  | -12.700021 | -0.785839 | 0.659609  |
| H  | -12.076158 | -0.411216 | 1.473832  |
| H  | -12.563498 | -1.865534 | 0.556078  |
| H  | -13.747611 | -0.569968 | 0.882912  |

### Adduct of $\epsilon$ -CL to monomer 3a

54

scf done: -1422.185576

|    |            |           |           |
|----|------------|-----------|-----------|
| B  | -8.718172  | 2.585021  | 5.132565  |
| H  | -9.111610  | 3.034016  | 4.069474  |
| H  | -8.442788  | 1.415195  | 5.138317  |
| H  | -8.070918  | 3.360429  | 5.786075  |
| Ca | -11.354868 | 2.954189  | 3.183468  |
| O  | -11.681681 | 1.735240  | 5.070131  |
| C  | -11.151823 | 2.549404  | 5.903868  |
| C  | -11.386976 | 2.318363  | 7.393295  |
| C  | -10.611793 | 3.221680  | 8.355886  |
| C  | -10.630376 | 4.716805  | 8.004545  |
| C  | -11.979920 | 5.239252  | 7.505925  |
| C  | -12.385784 | 4.655752  | 6.131561  |
| O  | -11.318241 | 3.950139  | 5.491120  |
| N  | -12.967468 | 4.400675  | 2.193326  |
| Si | -14.695240 | 4.556526  | 2.359783  |
| P  | -12.014068 | 5.219258  | 1.130643  |
| C  | -10.395572 | 4.514127  | 1.148556  |
| P  | -9.960207  | 2.978284  | 0.392432  |
| C  | -10.242658 | 2.861490  | -1.435359 |
| C  | -12.826519 | 5.335475  | -0.529709 |
| C  | -11.763958 | 6.983909  | 1.605459  |
| C  | -8.123606  | 2.887569  | 0.528477  |
| N  | -10.736892 | 1.778934  | 1.200727  |
| Si | -10.824082 | 0.100621  | 0.731298  |
| H  | -9.883248  | 2.520930  | 5.874409  |
| H  | -11.537788 | -0.112219 | -0.577981 |
| H  | -15.144051 | 5.947455  | 2.730649  |
| H  | -15.462649 | 4.192442  | 1.117088  |
| H  | -15.134671 | 3.633866  | 3.454166  |
| H  | -9.478144  | -0.558623 | 0.581593  |
| H  | -11.582333 | -0.632993 | 1.791416  |
| H  | -9.599333  | 5.255682  | 1.135627  |
| H  | -7.651096  | 3.692481  | -0.041105 |
| H  | -7.851108  | 2.969126  | 1.582681  |
| H  | -7.786306  | 1.921870  | 0.144225  |
| H  | -9.771882  | 3.709240  | -1.939783 |
| H  | -9.815675  | 1.929349  | -1.817072 |
| H  | -11.315246 | 2.862491  | -1.637138 |
| H  | -13.749953 | 5.917129  | -0.454250 |
| H  | -12.152759 | 5.811545  | -1.246189 |
| H  | -13.077201 | 4.328470  | -0.869525 |
| H  | -11.182589 | 7.510060  | 0.843731  |
| H  | -12.737390 | 7.466252  | 1.721634  |
| H  | -11.232121 | 7.013217  | 2.558924  |
| H  | -13.261468 | 3.999940  | 6.213752  |
| H  | -12.765378 | 5.020966  | 8.240841  |
| H  | -12.651786 | 5.454159  | 5.433294  |
| H  | -11.923902 | 6.331448  | 7.432765  |

|   |            |          |          |
|---|------------|----------|----------|
| H | -10.331777 | 5.292541 | 8.888554 |
| H | -9.878768  | 4.916405 | 7.234729 |
| H | -11.032421 | 3.072666 | 9.358534 |
| H | -9.569165  | 2.887431 | 8.410003 |
| H | -12.469030 | 2.415183 | 7.550997 |
| H | -11.152720 | 1.265523 | 7.575427 |

### Nucleophilic Attack TS to 3a

54

scf done: -1422.172309

|    |            |           |           |
|----|------------|-----------|-----------|
| B  | -9.540411  | -0.019627 | 6.046982  |
| H  | -8.889031  | 0.440304  | 5.155161  |
| H  | -10.427650 | -0.780948 | 5.813946  |
| H  | -9.233313  | 0.212412  | 7.181120  |
| Ca | -11.619902 | 2.961941  | 3.150254  |
| O  | -11.877584 | 1.902022  | 5.033504  |
| C  | -11.204505 | 2.627033  | 5.914837  |
| C  | -12.018641 | 3.074320  | 7.131518  |
| C  | -11.253412 | 3.780767  | 8.278287  |
| C  | -9.860653  | 4.318713  | 7.922026  |
| C  | -9.845090  | 5.426843  | 6.863855  |
| C  | -10.782902 | 5.153476  | 5.693183  |
| O  | -10.652567 | 3.849872  | 5.147892  |
| N  | -13.429686 | 4.053398  | 2.049614  |
| Si | -15.160267 | 3.853704  | 2.142002  |
| P  | -12.626320 | 5.123508  | 1.095472  |
| C  | -10.888236 | 4.850624  | 1.242041  |
| P  | -9.986655  | 3.517935  | 0.518331  |
| C  | -10.119608 | 3.354349  | -1.322969 |
| C  | -13.301477 | 5.102353  | -0.629298 |
| C  | -12.867238 | 6.878579  | 1.613397  |
| C  | -8.213818  | 3.972749  | 0.756162  |
| N  | -10.405806 | 2.120492  | 1.271164  |
| Si | -9.933818  | 0.509122  | 0.796863  |
| H  | -10.260431 | 2.141532  | 6.260423  |
| H  | -10.386809 | 0.136520  | -0.590644 |
| H  | -15.880239 | 5.089259  | 2.618757  |
| H  | -15.797625 | 3.487921  | 0.827179  |
| H  | -15.446935 | 2.753760  | 3.114044  |
| H  | -8.443645  | 0.287578  | 0.818417  |
| H  | -10.556337 | -0.452995 | 1.757325  |
| H  | -10.316006 | 5.774197  | 1.304272  |
| H  | -7.969127  | 4.883743  | 0.203368  |
| H  | -8.034521  | 4.128073  | 1.822133  |
| H  | -7.585025  | 3.151791  | 0.403289  |
| H  | -9.890213  | 4.310364  | -1.800435 |
| H  | -9.421558  | 2.591698  | -1.680527 |
| H  | -11.133772 | 3.046593  | -1.583897 |

|   |            |          |           |
|---|------------|----------|-----------|
| H | -14.348268 | 5.419674 | -0.623584 |
| H | -12.720574 | 5.769382 | -1.270937 |
| H | -13.252643 | 4.082037 | -1.014865 |
| H | -12.378617 | 7.559178 | 0.911211  |
| H | -13.937131 | 7.097202 | 1.650841  |
| H | -12.441351 | 7.009474 | 2.610262  |
| H | -11.821921 | 5.338508 | 6.000882  |
| H | -10.148711 | 6.383901 | 7.310966  |
| H | -10.568173 | 5.848646 | 4.871447  |
| H | -8.820389  | 5.561185 | 6.496359  |
| H | -9.378729  | 4.690482 | 8.834574  |
| H | -9.235371  | 3.489529 | 7.572824  |
| H | -11.866782 | 4.600575 | 8.675292  |
| H | -11.129664 | 3.077553 | 9.109967  |
| H | -12.854677 | 3.680703 | 6.762909  |
| H | -12.476596 | 2.151794 | 7.501520  |

### Borane complex of 3a

54

scf done: -1422.243342

|    |            |          |           |
|----|------------|----------|-----------|
| C  | -7.196341  | 7.818970 | -1.025467 |
| Ca | -7.921893  | 5.173446 | -1.231789 |
| N  | -8.382113  | 6.512979 | -3.159240 |
| Si | -9.128138  | 6.176840 | -4.696205 |
| P  | -7.627976  | 7.909709 | -2.731415 |
| C  | -8.628049  | 9.384990 | -3.238884 |
| P  | -8.320636  | 7.866197 | 0.331451  |
| N  | -9.159395  | 6.453284 | 0.376743  |
| Si | -10.480559 | 6.089205 | 1.452757  |
| C  | -6.026784  | 8.170600 | -3.607956 |
| C  | -7.256337  | 8.129256 | 1.814070  |
| C  | -9.467126  | 9.321739 | 0.375876  |
| O  | -9.137430  | 3.056970 | -1.254261 |
| C  | -10.429056 | 2.671578 | -1.719555 |
| C  | -10.965472 | 1.399778 | -1.077097 |
| C  | -10.006102 | 0.205372 | -1.178043 |
| C  | -9.233350  | 0.127771 | -2.501167 |
| C  | -8.219028  | 1.274798 | -2.749000 |
| C  | -7.971899  | 2.226341 | -1.586533 |
| O  | -6.971628  | 3.121990 | -1.898841 |
| B  | -5.997785  | 3.510255 | -0.776655 |
| H  | -6.760626  | 9.102359 | 1.765513  |
| H  | -10.414701 | 2.567905 | -2.812322 |
| H  | -7.719617  | 1.678927 | -0.668010 |
| H  | -8.194752  | 6.308301 | -5.871609 |
| H  | -10.308389 | 7.061165 | -5.003895 |
| H  | -9.624496  | 4.763556 | -4.671085 |
| H  | -6.201555  | 8.151529 | -4.686349 |



|   |            |           |           |
|---|------------|-----------|-----------|
| H | -5.349034  | 7.357366  | -3.339694 |
| H | -5.584046  | 9.129626  | -3.326039 |
| H | -8.721148  | 9.413384  | -4.328676 |
| H | -9.627459  | 9.305329  | -2.806962 |
| H | -8.147208  | 10.302494 | -2.890452 |
| H | -6.217910  | 8.236104  | -0.797956 |
| H | -10.181754 | 9.238627  | -0.445259 |
| H | -10.021557 | 9.330673  | 1.318978  |
| H | -8.898511  | 10.249983 | 0.278328  |
| H | -7.875951  | 8.078504  | 2.712577  |
| H | -6.508725  | 7.333968  | 1.848435  |
| H | -10.127992 | 6.206779  | 2.913156  |
| H | -10.908211 | 4.676521  | 1.203998  |
| H | -11.686994 | 6.968856  | 1.248975  |
| H | -7.231762  | 0.861796  | -2.976608 |
| H | -8.492292  | 1.876460  | -3.623108 |
| H | -8.701524  | -0.829562 | -2.525088 |
| H | -9.949607  | 0.088686  | -3.331752 |
| H | -9.295183  | 0.240577  | -0.344637 |
| H | -10.574012 | -0.722083 | -1.040153 |
| H | -11.910242 | 1.165268  | -1.586421 |
| H | -11.212251 | 1.590380  | -0.026540 |
| H | -11.082800 | 3.517609  | -1.485366 |
| H | -6.669417  | 3.734891  | 0.250122  |
| H | -5.149856  | 2.676199  | -0.559015 |
| H | -5.509768  | 4.580103  | -1.158076 |

### Ring Opening TS to 3a

54

scf done: -1422.181607

|    |            |          |           |
|----|------------|----------|-----------|
| C  | -7.377244  | 7.501213 | -1.243664 |
| Ca | -8.938704  | 5.236456 | -1.507192 |
| N  | -9.072049  | 6.766961 | -3.321640 |
| Si | -10.033674 | 6.802904 | -4.774676 |
| P  | -7.945657  | 7.878411 | -2.867119 |
| C  | -8.585876  | 9.598447 | -3.114237 |
| P  | -8.260924  | 7.725400 | 0.263199  |
| N  | -9.509729  | 6.654698 | 0.316363  |
| Si | -10.787680 | 6.620650 | 1.501999  |
| C  | -6.430138  | 7.834809 | -3.916877 |
| C  | -7.008481  | 7.442817 | 1.585537  |
| C  | -8.850178  | 9.448897 | 0.603405  |
| O  | -9.721160  | 3.201164 | -1.669011 |
| C  | -10.420773 | 2.410397 | -2.568239 |
| C  | -10.858882 | 1.053876 | -1.993735 |
| C  | -9.806775  | 0.352983 | -1.127354 |
| C  | -8.405763  | 0.158062 | -1.727235 |
| C  | -7.625284  | 1.434612 | -2.074997 |

|   |            |           |           |
|---|------------|-----------|-----------|
| C | -7.709036  | 2.507450  | -1.032199 |
| O | -7.152511  | 3.701402  | -1.248863 |
| B | -5.965481  | 3.255664  | -0.352689 |
| H | -6.228196  | 8.207670  | 1.547635  |
| H | -9.829576  | 2.214239  | -3.487545 |
| H | -8.287439  | 2.365788  | -0.125054 |
| H | -9.217572  | 6.758369  | -6.040742 |
| H | -10.914824 | 8.018493  | -4.891777 |
| H | -10.921060 | 5.596991  | -4.766240 |
| H | -6.715996  | 7.961802  | -4.963792 |
| H | -5.949378  | 6.862192  | -3.791558 |
| H | -5.737044  | 8.628812  | -3.626925 |
| H | -8.786716  | 9.774373  | -4.175066 |
| H | -9.520642  | 9.710492  | -2.561165 |
| H | -7.854124  | 10.326126 | -2.755002 |
| H | -6.297617  | 7.568955  | -1.132943 |
| H | -9.634888  | 9.708667  | -0.109701 |
| H | -9.263925  | 9.510087  | 1.614384  |
| H | -8.018433  | 10.151338 | 0.507571  |
| H | -7.504818  | 7.475252  | 2.558488  |
| H | -6.565311  | 6.455242  | 1.438947  |
| H | -10.298128 | 6.449031  | 2.916993  |
| H | -11.677010 | 5.459085  | 1.184738  |
| H | -11.640281 | 7.862241  | 1.507257  |
| H | -6.570285  | 1.202087  | -2.255611 |
| H | -7.990773  | 1.886649  | -3.001591 |
| H | -7.812473  | -0.429023 | -1.013960 |
| H | -8.473131  | -0.453745 | -2.635754 |
| H | -9.725205  | 0.900099  | -0.181103 |
| H | -10.189261 | -0.638498 | -0.853006 |
| H | -11.156995 | 0.404212  | -2.829297 |
| H | -11.754460 | 1.193132  | -1.374319 |
| H | -11.325387 | 2.933465  | -2.930121 |
| H | -6.329728  | 2.066674  | -0.098968 |
| H | -4.960507  | 3.153242  | -1.009172 |
| H | -5.958646  | 3.859011  | 0.693531  |

### Product from 3a

54

scf done: -1422.243811

|    |           |          |           |
|----|-----------|----------|-----------|
| C  | -7.341346 | 7.363596 | -1.245595 |
| Ca | -8.876553 | 5.053599 | -1.924656 |
| N  | -8.851433 | 6.825024 | -3.525060 |
| Si | -9.715513 | 7.037911 | -5.026355 |
| P  | -7.843221 | 7.925169 | -2.838222 |
| C  | -8.589470 | 9.621398 | -2.886265 |
| P  | -8.321082 | 7.350184 | 0.214853  |
| N  | -9.494422 | 6.207981 | 0.083540  |

|    |            |           |           |
|----|------------|-----------|-----------|
| Si | -10.838668 | 6.005117  | 1.177390  |
| C  | -6.268674  | 8.146166  | -3.774786 |
| C  | -7.119941  | 7.004734  | 1.575199  |
| C  | -9.038762  | 8.982236  | 0.725847  |
| O  | -9.967676  | 3.365591  | -2.396596 |
| C  | -10.596819 | 2.222221  | -2.826260 |
| C  | -11.074578 | 1.310114  | -1.681616 |
| C  | -10.044707 | 1.037382  | -0.578201 |
| C  | -8.707409  | 0.414781  | -1.014238 |
| C  | -7.706955  | 1.393322  | -1.649611 |
| C  | -7.177476  | 2.421467  | -0.661382 |
| O  | -6.790398  | 3.637533  | -1.357650 |
| B  | -5.496414  | 3.904954  | -1.645665 |
| H  | -6.397824  | 7.820169  | 1.669156  |
| H  | -9.935016  | 1.611970  | -3.480726 |
| H  | -7.952205  | 2.724941  | 0.047502  |
| H  | -8.811736  | 7.353649  | -6.192264 |
| H  | -10.731057 | 8.149930  | -4.985281 |
| H  | -10.436539 | 5.766635  | -5.337932 |
| H  | -6.504268  | 8.399765  | -4.811122 |
| H  | -5.715062  | 7.205229  | -3.752659 |
| H  | -5.663848  | 8.941351  | -3.331133 |
| H  | -8.732560  | 9.935615  | -3.924442 |
| H  | -9.565197  | 9.595992  | -2.396794 |
| H  | -7.937712  | 10.334632 | -2.375598 |
| H  | -6.280482  | 7.509274  | -1.054312 |
| H  | -9.806985  | 9.276058  | 0.008174  |
| H  | -9.500856  | 8.894712  | 1.713722  |
| H  | -8.254814  | 9.743127  | 0.757004  |
| H  | -7.667337  | 6.891241  | 2.513971  |
| H  | -6.595613  | 6.073803  | 1.350398  |
| H  | -10.414866 | 5.778026  | 2.607743  |
| H  | -11.622925 | 4.811038  | 0.739247  |
| H  | -11.772259 | 7.186521  | 1.212367  |
| H  | -6.863152  | 0.845095  | -2.087380 |
| H  | -8.204873  | 1.951559  | -2.445179 |
| H  | -8.234998  | -0.066325 | -0.145339 |
| H  | -8.898925  | -0.394432 | -1.730635 |
| H  | -9.860974  | 1.980204  | -0.049499 |
| H  | -10.506877 | 0.370936  | 0.161491  |
| H  | -11.417387 | 0.357896  | -2.114037 |
| H  | -11.950764 | 1.770454  | -1.205304 |
| H  | -11.480562 | 2.446515  | -3.455369 |
| H  | -6.312260  | 2.057920  | -0.096412 |
| H  | -4.632324  | 3.162011  | -1.270755 |
| H  | -5.279400  | 4.898185  | -2.274041 |
